# Supplementary material for: NALPS: a precisely dated European climate record 120–60 ka
Source: Copernicus journal article supplement (doi:10.5194/cp-7-1247-2011), 2011-11-24
Supplement: Supplementary file 1 [file Supplementary-table.xls]

## Sheet: data
Stalagmite KC1			Stalagmite BA1			Stalagmite BA1b			Stalagmite BA2			Stalagmite EXC3			Stalagmite EXC4			Stalagmite SCH7
Age, a BP	d18O, ‰ VPDB		Age, a BP	d18O, ‰ VPDB		Age, a BP	d18O, ‰ VPDB		Age, a BP	d18O, ‰ VPDB		Age, a BP	d18O, ‰ VPDB		Age, a BP	d18O, ‰ VPDB		Age, a BP	d18O, ‰ VPDB
63718.7	-10.4783		80982.1	-8.09331		75492.4	-8.28707		88610	-10.6666		100839	-8.24566		77469.5	-9.31177		111589	-8.64819
63757.2	-10.4717		80984.1	-8.15312		75498.2	-8.69332		88613.7	-10.5858		100842	-8.10456		77472.8	-9.34062		111600	-9.20757
63785	-10.4072		80986.2	-8.21086		75503.9	-8.50856		88621.1	-10.3023		100844	-8.25215		77476.1	-9.45976		111612	-9.12379
63794.3	-10.433		80988.2	-8.23742		75509.6	-8.52983		88625	-10.268		100847	-8.40554		77479.2	-9.46567		111624	-8.61528
63799.6	-10.3892		80990.3	-8.03504		75515.3	-8.41531		88629	-10.4714		100850	-8.48532		77482.4	-9.31713		111636	-8.49527
63801.7	-10.2623		80992.3	-8.14968		75521.1	-8.57852		88633.2	-10.6589		100852	-8.55527		77485.5	-9.35912		111648	-8.5918
63801.8	-10.3769		80994.3	-8.03006		75526.8	-8.53858		88637.6	-10.5262		100855	-8.51261		77488.7	-8.9716		111660	-8.5296
63801.8	-10.4007		80996.3	-7.95287		75532.6	-8.47757		88642.4	-10.7538		100857	-8.42125		77491.9	-9.32191		111672	-8.59492
63801.8	-10.3271		80998.3	-7.84706		75538.4	-8.44339		88647.6	-10.6098		100860	-8.43939		77495.2	-9.61306		111684	-8.70347
63801.8	-10.3997		81000.3	-7.92259		75544.2	-8.45917		88653.2	-10.4025		100862	-8.37146		77498.5	-9.64404		111696	-8.77463
63801.9	-10.3647		81002.3	-7.86103		75555.9	-8.63485		88659.3	-10.1071		100865	-8.42797		77501.9	-9.70069		111708	-8.77442
63801.9	-10.4228		81004.3	-7.89744		75561.8	-8.51466		88665.8	-10.1964		100867	-8.25968		77505.4	-9.68646		111720	-8.73694
63801.9	-10.3438		81006.3	-7.90195		75567.8	-8.6028		88672.5	-10.0721		100870	-8.23644		77509	-9.77445		111732	-8.75414
63801.9	-10.505		81008.4	-7.96835		75573.7	-8.47675		88679.4	-10.129		100872	-8.28966		77512.5	-9.76845		111744	-8.8642
63803.2	-10.5594		81010.4	-7.95164		75579.7	-8.38942		88686.3	-9.63645		100875	-8.11464		77516.2	-9.58871		111756	-8.93981
63805.6	-10.5321		81012.4	-7.99682		75597.7	-8.61098		88693.1	-9.11482		100877	-8.37678		77519.8	-9.57399		111768	-8.93664
63808.7	-10.739		81014.4	-8.10631		75603.8	-8.70404		88699.6	-8.67134		100880	-8.2746		77523.5	-9.63987		111780	-9.04364
63812.6	-10.5178		81016.4	-8.12984		75609.8	-8.67703		88705.8	-8.59946		100882	-8.14218		77527.1	-9.63502		111792	-8.90793
63817.1	-10.6181		81018.4	-8.10292		75615.8	-8.76229		88711.5	-8.90186		100884	-7.98686		77530.8	-9.54288		111804	-8.93853
63825.6	-10.5922		81020.3	-7.94275		75621.7	-8.80363		88716.7	-8.73925		100886	-7.88983		77534.5	-9.56228		111817	-8.96953
63836.1	-10.6376		81022.2	-7.95046		75627.7	-8.6018		88721.2	-8.93545		100889	-8.21553		77538.2	-9.52575		111829	-9.10587
63846.8	-10.6556		81024.1	-8.0407		75633.6	-8.57989		88725	-8.87615		100891	-8.24272		77541.9	-9.20565		111841	-9.10552
63857.6	-10.6967		81025.9	-7.97146		75639.5	-8.65935		88728.3	-9.05909		100893	-8.31402		77545.6	-8.90364		111852	-9.01382
63868.2	-10.8611		81027.7	-7.95386		75645.3	-8.63814		88731.3	-9.0224		100895	-8.33236		77549.4	-8.58863		111864	-9.00222
63878.3	-10.9223		81029.6	-7.9773		75651.1	-8.61111		88733.9	-8.83387		100897	-8.4135		77553.1	-8.81368		111876	-9.04482
63887.6	-11.0226		81031.5	-8.0987		75656.8	-8.60281		88736.3	-8.90893		100899	-8.42237		77556.9	-8.96161		111888	-9.02541
63896.2	-11.0686		81033.4	-8.01044		75662.5	-8.62329		88738.6	-8.95566		100901	-8.4406		77560.7	-8.99257		111900	-9.04399
63904.2	-11.0782		81035.4	-8.19476		75668.1	-8.73253		88740.9	-9.15118		100904	-8.3123		77564.5	-9.28743		111911	-8.97254
63911.6	-10.9437		81037.5	-8.07648		75673.6	-8.67975		88743.3	-9.16266		100906	-8.48435		77568.4	-9.1784		111923	-9.06242
63918.6	-10.9242		81039.6	-8.04783		75679	-8.7689		88745.9	-8.92839		100908	-8.45538		77572.2	-9.13734		111935	-8.96926
63925.1	-10.9794		81041.9	-8.15001		75684.4	-8.72294		88748.8	-8.92923		100910	-8.48027		77576.1	-9.03283		111958	-8.98005
63931.4	-10.928		81044.3	-8.07722		75689.7	-8.67704		88751.9	-9.06059		100912	-8.44356		77580	-9.03921		111969	-9.15765
63937.3	-11.0178		81046.8	-8.14733		75695	-8.68143		88755.3	-8.85645		100914	-8.31488		77583.9	-8.94568		111981	-9.10576
63943.1	-10.8971		81049.4	-8.01337		75700.3	-9.11822		88758.9	-8.93283		100916	-8.31751		77587.9	-8.97298		111992	-9.07424
63948.8	-10.8636		81052	-8.15868		75705.5	-8.88428		88762.6	-8.94592		100918	-8.2616		77591.9	-9.06085		112004	-9.12097
63954.5	-10.8934		81054.7	-8.03996		75710.8	-8.82397		88766.6	-8.61486		100920	-8.33815		77595.9	-8.94098		112016	-9.01031
63960.3	-10.9375		81057.3	-8.01522		75716	-8.89265		88770.6	-8.73137		100922	-8.22299		77599.9	-8.66124		112027	-8.81956
63966.1	-10.9509		81060	-8.12387		75721.3	-8.98403		88774.8	-8.87842		100924	-8.21554		77603.8	-8.51041		112039	-8.93927
63972.2	-10.8929		81062.6	-8.10182		75726.5	-9.27376		88779	-9.0245		100926	-8.26		77607.8	-8.88923		112051	-9.00286
63978.5	-10.9149		81065.1	-8.26632		75731.8	-8.93303		88783.3	-8.96794		100928	-8.339		77611.6	-9.12652		112063	-9.02005
63985.1	-10.871		81067.5	-8.30002		75737.1	-8.65641		88787.6	-9.02059		100929	-8.27168		77615.5	-8.99669		112076	-9.02136
63991.7	-10.9029		81069.8	-8.28501		75742.4	-8.75005		88791.9	-9.13608		100931	-8.35181		77619.2	-8.83465		112088	-9.00767
63998.6	-10.903		81072	-8.43565		75747.7	-9.05995		88796.2	-9.15527		100933	-8.35884		77622.9	-8.84576		112101	-9.05296
64005.5	-10.8222		81074.1	-8.29009		75752.9	-8.89052		88800.5	-9.27298		100935	-8.26629		77626.6	-8.71713		112113	-9.1635
64012.6	-10.9951		81076.1	-8.22513		75758.1	-8.78939		88804.8	-9.00215		100936	-8.22676		77630.3	-8.84171		112126	-9.17201
64019.7	-10.9426		81078	-8.35918		75763.2	-8.76082		88809.1	-9.20991		100938	-8.26457		77634	-8.9163		112139	-9.19074
64026.9	-10.9708		81079.9	-8.23826		75768.3	-8.58365		88813.4	-9.01761		100939	-8.27799		77637.7	-9.06384		112152	-9.07442
64034.1	-10.9268		81081.8	-8.28333		75773.3	-8.61347		88817.6	-8.82104		100941	-8.20072		77641.5	-9.08286		112165	-8.93086
64041.2	-10.9493		81083.6	-8.45604		75778.2	-8.58833		88821.8	-9.00494		100942	-8.34205		77645.3	-9.12558		112179	-8.7268
64048.4	-10.9597		81085.5	-8.34139		75783	-8.47611		88826	-9.04101		100944	-8.31378		77649.2	-8.94395		112192	-8.98724
64055.5	-10.9534		81087.3	-8.34824		75787.8	-8.65306		88830.1	-8.68468		100945	-8.25176		77653.2	-8.8168		112205	-8.88495
64062.6	-10.9955		81089.2	-8.24316		75792.5	-8.69291		88834.2	-8.53179		100947	-8.23625		77657.3	-8.79354		112219	-8.85979
64069.5	-10.9372		81091.1	-8.21864		75797.2	-8.66634		88838.2	-8.55983		100948	-8.24973		77661.3	-8.82548		112232	-8.98464
64076.4	-10.9222		81093	-8.38224		75801.9	-8.45227		88842.1	-8.73615		100950	-8.2207		77665.4	-8.86917		112246	-9.18558
64083.2	-11.0234		81094.9	-8.22163		75806.6	-8.37329		88845.9	-8.80178		100951	-8.19604		77669.4	-8.73567		112259	-9.10704
64090	-11.0597		81096.9	-8.40335		75811.2	-8.58281		88849.7	-8.57842		100952	-8.12271		77673.4	-8.75735		112273	-9.08486
64096.7	-10.9554		81098.9	-8.61878		75815.9	-8.71186		88853.3	-8.7551		100954	-8.08884		77677.3	-8.84082		112286	-9.0638
64103.4	-11.0408		81100.9	-8.54038		75820.6	-8.84435		88856.8	-8.83088		100955	-8.06055		77681.1	-8.87657		112300	-9.22787
64110	-11.0422		81102.9	-8.3828		75825.4	-8.95288		88860.1	-8.23297		100956	-8.12588		77684.8	-8.88622		112313	-8.98307
64116.6	-11.1067		81104.9	-8.52627		75830.2	-9.05346		88863.3	-8.17243		100958	-8.25894		77688.4	-8.92947		112327	-9.11704
64123.3	-11.0042		81106.9	-8.54708		75835	-9.17553		88866.4	-8.27197		100959	-8.12843		77691.9	-9.08428		112340	-8.96139
64129.9	-11.0228		81108.9	-8.55397		75839.8	-9.36725		88869.3	-8.41252		100960	-8.03887		77695.3	-9.0509		112353	-9.00846
64143.2	-10.9524		81111	-8.40565		75844.6	-9.39855		88872.2	-8.56404		100962	-8.05132		77698.7	-9.16422		112367	-8.89509
64150	-10.9398		81113	-8.64421		75849.4	-9.43151		88875	-8.19225		100963	-7.97054		77702	-9.15222		112379	-8.91876
64156.7	-10.8785		81115.1	-8.33391		75854.2	-9.53949		88877.7	-8.13594		100965	-8.06886		77705.3	-9.20492		112392	-9.09503
64163.5	-10.8776		81117.1	-8.39228		75858.9	-9.66328		88880.5	-8.30098		100966	-8.09494		77708.5	-9.10633		112405	-8.88306
64170.4	-10.8983		81119.2	-8.32644		75863.6	-10.0649		88883.3	-8.42156		100967	-8.02869		77711.7	-8.94243		112417	-8.91666
64177.3	-10.9041		81121.3	-8.22423		75868.3	-10.1469		88886.1	-8.52968		100969	-7.94534		77714.9	-9.01557		112429	-9.147
64184.2	-10.9056		81123.4	-8.23742		75872.8	-10.4095		88889	-8.60685		100971	-8.01547		77718.2	-8.84668		112441	-9.05699
64191.1	-10.8668		81125.5	-8.34567		75877.3	-10.5743		88892.1	-8.48597		100972	-8.01855		77721.6	-8.85325		112453	-9.22796
64198.1	-10.8646		81127.7	-8.22848		75881.8	-10.6098		88895.3	-8.76597		100974	-7.98298		77725.1	-8.96006		112465	-9.23479
64205.1	-10.7567		81129.8	-8.33151		75886.3	-10.6008		88898.6	-9.1195		100975	-8.0518		77728.8	-8.96745		112476	-9.11625
64212.1	-10.9025		81131.9	-8.3062		75890.7	-10.6123		88902.1	-8.69835		100977	-7.99189		77732.7	-8.86724		112488	-9.17181
64219.1	-10.9203		81134.1	-8.2322		75895.2	-10.6801		88905.6	-8.76574		100979	-8.16253		77736.8	-8.97609		112499	-9.16451
64226	-10.8204		81136.3	-8.31254		75899.8	-10.7807		88909.1	-8.91516		100981	-8.08737		77741	-9.04354		112510	-9.26208
64233	-10.8811		81138.4	-8.4196		75904.3	-10.8765		88912.7	-8.96973		100983	-8.06218		77745.4	-9.09906		112522	-9.26426
64240	-10.8724		81140.6	-8.34825		75909	-10.8435		88916.3	-8.99009		100985	-8.18869		77749.8	-8.76592		112533	-9.25124
64247	-10.8965		81142.8	-8.36717		75913.7	-10.9699		88919.8	-9.2191		100987	-8.0057		77754.2	-8.91157		112544	-9.1199
64254	-10.8771		81145	-8.19677		75918.5	-10.871		88923.2	-9.13349		100989	-8.15642		77758.6	-8.89503		112555	-9.14626
64260.9	-10.7812		81147.2	-8.24292		75923.5	-10.7651		88926.6	-9.14304		100991	-8.20422		77762.8	-8.9706		112566	-9.10455
64267.8	-10.8378		81149.4	-8.37168		75928.7	-10.7135		88929.9	-9.43815		100993	-8.00318		77766.7	-9.00372		112577	-9.16418
64274.6	-10.7567		81151.7	-8.30137		75934	-10.9072		88933	-9.32326		100995	-7.89341		77770.5	-8.97548		112589	-9.09976
64281.5	-10.8203		81153.9	-8.4616		75939.5	-11.0581		88936.1	-9.29135		100997	-8.07707		77774	-8.9753		112600	-9.27186
64288.2	-10.7871		81156.1	-8.34013		75945.3	-10.9281		88939	-9.28822		101000	-8.14976		77777.4	-8.95014		112611	-9.24294
64294.9	-10.7358		81158.4	-8.31182		75951.3	-10.9848		88942	-9.23005		101002	-8.0816		77780.8	-8.98368		112622	-9.2396
64301.6	-10.7127		81160.6	-8.17529		75957.6	-10.9633		88944.8	-9.2063		101005	-8.05726		77784.1	-8.99882		112634	-9.21276
64308.1	-10.6729		81162.8	-8.17785		75964.3	-11.0582		88947.7	-9.32414		101007	-7.95617		77787.6	-8.94433		112645	-9.16433
64314.6	-10.757		81165.1	-8.24518		75978.5	-10.9847		88950.5	-10.192		101010	-8.09482		77791.2	-8.98217		112656	-9.00861
64321	-10.6207		81167.3	-8.24284		75986.2	-10.8401		88953.3	-9.86401		101012	-8.20911		77795	-8.89944		112668	-9.08674
64327.4	-10.547		81169.5	-8.0563		75994	-10.921		88956.1	-9.95377		101015	-8.15637		77799.1	-9.1138		112679	-9.03734
64333.6	-10.5998		81171.8	-7.9945		76001.9	-10.9761		88959	-9.87914		101017	-8.09524		77803.4	-9.13563		112690	-9.00541
64339.7	-10.5004		81174	-8.11689		76009.9	-10.9759		88961.9	-10.0034		101020	-8.1432		77807.9	-8.96083		112702	-9.0956
64345.7	-10.4447		81176.2	-8.09992		76017.9	-10.8686		88964.8	-10.0331		101022	-8.12417		77812.4	-8.91422		112713	-8.99834
64351.6	-10.5357		81178.4	-8.19057		76025.8	-11.0077		88967.7	-9.92285		101025	-8.14893		77816.9	-8.95252		112724	-9.04404
64357.4	-10.5884		81180.7	-8.18749		76033.5	-11.0181		88970.7	-9.72704		101027	-8.02553		77821.4	-8.8473		112735	-9.04117
64363.1	-10.5453		81182.9	-8.24545					88973.7	-9.74632		101030	-7.9794		77825.8	-8.89299		112746	-9.24773
64368.7	-10.5275		81185.2	-8.02777		77569.5	-10.6307		88976.7	-9.71684		101032	-8.00433		77833.8	-8.93742		112757	-9.26401
64374.2	-10.5598		81187.5	-8.12602		77574.6	-10.2044		88979.8	-9.52773		101035	-7.95909		77837.4	-8.92845		112768	-9.16482
64379.5	-10.6314		81189.8	-8.14593		77579.7	-9.61605		88982.8	-9.78296		101037	-8.02376		77840.9	-8.85671		112779	-9.2204
64384.7	-10.6861		81192.2	-8.05885		77584.7	-8.47095		88985.9	-9.40819		101040	-7.95121		77844.3	-8.76167		112790	-9.26009
64389.8	-10.6201		81194.6	-8.00151		77589.9	-7.9185		88992.2	-9.57509		101042	-7.82694		77847.7	-8.87633		112801	-9.15214
64394.8	-10.5827		81197.1	-8.10543		77595.3	-8.08579		88995.3	-9.55579		101045	-8.05847		77851.1	-8.88792		112811	-9.25102
64399.7	-10.5135		81199.6	-8.34299		77601	-8.23878		88998.5	-9.58555		101047	-8.05303		77854.6	-8.83213		112822	-9.17331
64404.4	-10.7636		81202.1	-8.15826		77607.2	-8.44847		89001.7	-9.44451		101050	-8.06941		77858.2	-8.80781		112832	-9.14409
64409.1	-10.8126		81204.6	-8.21652		77613.9	-8.3462		89004.9	-9.71767		101052	-8.13267		77862	-8.8849		112842	-9.18914
64413.6	-10.7236		81207.2	-8.33289		77621.4	-8.49326		89008.1	-9.52508		101055	-8.13987		77866	-8.91713		112852	-9.24655
64418.1	-10.7209		81209.7	-8.37025		77629.6	-8.58929		89011.4	-9.39327		101057	-8.19402		77870.1	-8.83431		112862	-9.24937
64422.6	-10.8404		81212.2	-8.16659		77638.7	-8.50358		89014.6	-9.38931		101060	-8.11656		77874.3	-8.9044		112871	-9.34668
64427.2	-10.7696		81214.7	-8.1194		77648.5	-8.7564		89017.9	-9.44189		101063	-8.17055		77878.5	-8.91905		112881	-9.36679
64431.8	-10.8915		81217.1	-8.29771		77658.9	-8.78966		89021.2	-9.4318		101065	-8.2339		77882.8	-8.96911		112890	-9.16509
64436.7	-10.9438		81219.5	-8.19966		77669.6	-8.72252		89024.4	-9.24584		101068	-8.08119		77887	-8.94712		112899	-9.24236
64441.7	-10.9971		81221.8	-8.24966		77680.5	-8.74987		89027.7	-9.47106		101071	-8.02198		77891.1	-8.91999		112908	-9.17005
64446.9	-11.0635		81224.1	-8.38237		77691.4	-9.01409		89031.1	-9.33826		101074	-8.09783		77895.1	-8.95827		112917	-9.16208
64452.5	-11.1384		81226.3	-8.36391		77702.1	-9.06382		89034.4	-9.36218		101076	-8.0032		77899.1	-8.87492		112926	-9.24761
64458.3	-11.2227		81228.4	-8.32312		77712.5	-9.08551		89037.7	-9.37632		101079	-8.13551		77902.9	-8.87939		112935	-9.11922
64464.6	-11.3293		81230.5	-8.28877		77722.2	-9.06801		89041	-9.27864		101082	-8.07958		77906.7	-8.83902		112945	-9.1535
64471.2	-11.4717		81232.6	-8.3903		77731.3	-9.09537		89047.7	-9.18895		101085	-8.07301		77910.5	-8.9016		112954	-9.16971
64478.4	-11.5495		81234.7	-8.22927		77739.5	-9.06366		89051	-9.16989		101088	-8.22199		77914.3	-8.99495		112963	-9.19969
64486	-11.5277		81236.7	-8.07532		77746.9	-8.79014		89054.4	-9.09934		101090	-8.13942		77918.1	-8.93058		112972	-9.3176
64494	-11.642		81238.7	-8.1916		77753.7	-9.06395		89057.7	-9.18384		101093	-8.08682		77921.9	-8.81635		112981	-9.17654
64502.4	-11.7261		81240.8	-8.18207		77760	-9.19763		89061	-9.22958		101096	-8.192		77925.7	-8.8713		112991	-9.05571
64511.2	-11.5898		81242.8	-8.15985		77766	-9.04873		89064.3	-9.03773		101098	-8.20419		77929.7	-8.93208		113001	-9.11235
64520.2	-11.5648		81248.9	-8.5807		77771.9	-8.99591		89067.6	-8.97863		101101	-8.14961		77933.6	-8.88045		113010	-9.03527
64529.6	-11.4408		81250.9	-8.50166		77777.7	-8.92279		89070.8	-9.01025		101104	-8.20011		77937.6	-8.88668		113020	-8.98516
64539.1	-11.3354		81252.9	-8.44192		77783.7	-8.97783		89074	-9.01887		101106	-8.23667		77941.5	-8.92375		113030	-9.17838
64548.9	-11.2946		81254.9	-8.30971		77790	-8.95868		89077.1	-8.90544		101109	-8.12482		77945.5	-8.92371		113041	-9.04857
64558.9	-11.3787		81256.8	-8.21594		77796.7	-8.84664		89083	-8.85933		101111	-8.18587		77949.5	-8.89006		113051	-9.03951
64568.9	-11.3713		81258.8	-8.19144		77803.9	-9.00189		89085.9	-8.52962		101114	-8.43249		77953.4	-8.98079		113061	-9.06611
64579.1	-11.281		81260.7	-8.30704		77811.7	-8.83397		89088.7	-8.51871		101117	-8.41011		77957.4	-8.97947		113071	-9.28072
64589.3	-11.2094		81262.6	-8.23148		77819.8	-9.17704		89091.5	-8.5774		101119	-8.26696		77961.3	-8.87436		113082	-9.42055
64599.5	-11.2306		81264.5	-8.29039		77828.2	-9.10712		89094.2	-8.44033		101122	-8.40688		77965.2	-8.87266		113092	-9.04807
64609.7	-11.103		81266.4	-8.39647		77836.8	-9.1548		89096.9	-8.68433		101124	-8.39306		77969	-9.00008		113103	-9.13394
64619.9	-11.1719		81268.2	-8.02233		77845.5	-8.56163		89099.6	-8.4805		101127			77972.9	-8.96441		113114	-9.10683
64630.1	-11.0597		81270	-8.00953		77854.1	-8.90544		89102.3	-8.49505		101129	-8.23576		77976.8	-9.04804		113124	-8.98309
64640.4	-11.1109		81271.9	-7.99478		77862.6	-8.9093		89105	-8.37662		101132	-8.30312		77980.7	-9.00664		113135	-9.08366
64650.7	-11.1823		81273.7	-8.09963		77870.9	-8.88214		89107.8	-8.46963		101134	-8.3434		77984.6	-8.94244		113146	-8.98877
64661	-11.1071		81275.5	-8.31779		77878.8	-8.72906		89110.6	-8.47428		101137	-8.33746		77988.5	-8.9144		113156	-8.96435
64671.4	-11.0686		81277.3	-8.41276		77886.3	-8.74159		89113.6	-8.39032		101139	-8.36194		77992.4	-8.83927		113167	-9.02997
64681.9	-10.971		81279.1	-8.38951		77893.4	-8.70548		89116.6	-8.44134		101142	-8.28141		77996.3	-8.99676		113178	-8.99866
64692.4	-10.9009		81280.9	-8.46255		77900.1	-8.75395		89119.7	-8.4243		101145	-8.34517		78000.2	-8.89984		113189	-8.86734
64703	-10.8509		81282.7	-8.45197		77906.5	-8.72914		89123	-8.20967		101147	-8.45819		78004	-8.88939		113201	-8.92445
64713.7	-10.7669		81284.5	-8.35289		77912.7	-8.73392		89126.4	-8.13007		101150	-8.45306		78007.7	-8.92911		113212	-9.01899
64724.6	-10.7015		81286.3	-8.27618		77918.6	-8.68734		89130	-8.33676		101152	-8.43961		78011.4	-8.94749		113224	-9.04887
64735.5	-10.5301		81288.1	-8.52368		77924.4	-8.88978		89133.7	-8.15214		101155	-8.468		78015	-9.0055		113235	-9.01061
64746.6	-10.4417		81289.9	-8.5853		77930.1	-8.7073		89137.6	-8.32274		101158	-8.49531		78018.5	-8.95305		113247	-8.87128
64757.9	-10.5713		81291.7	-8.52806		77935.7	-8.57126		89141.7	-8.36784		101160	-8.41313		78021.9	-8.94379		113259	-8.95711
64769.2	-10.3562		81293.5	-8.38877		77941.4	-8.53603		89146	-8.2844		101163	-8.49302		78025.2	-9.01439		113271	-8.98278
64780.8	-10.168		81295.3	-8.42941		77947	-8.83084		89150.5	-8.28829		101166	-8.41791		78028.6	-9.02636		113284	-9.08301
64792.5	-10.1434		81297.1	-8.25937		77952.7	-8.68442		89155.3	-8.26584		101168	-8.37658		78032	-8.88999		113296	-9.00978
64804.3	-10.2078		81298.9	-8.23426		77958.4	-8.67296		89160.2	-8.03862		101171	-8.36221		78035.5	-8.86621		113309	-9.01843
64816.4	-10.2786		81300.7	-8.11605		77964.1	-8.51295		89165.3	-8.00868		101174	-8.30372		78039	-8.96321		113321	-9.07675
64828.6	-10.3332		81302.6	-8.1441		77969.8	-8.72675		89170.5	-7.95832		101176	-8.41699		78042.7	-8.80994		113334	-9.18229
64841.1	-10.3593		81304.4	-8.06092		77975.4	-8.6143		89175.9	-8.07653		101179	-8.50978		78046.6	-8.95519		113346	-8.93097
64853.7	-10.5076		81306.2	-8.18024		77981.1	-8.94118		89181.4	-8.22496		101182	-8.52296		78050.6	-8.90561		113358	-8.95499
64866.6	-10.1726		81308	-8.36244		77986.7	-8.75408		89186.9	-8.24183		101184	-8.44908		78054.7	-8.88927		113370	-9.21129
64879.7	-10.4353		81309.9	-8.3501		77992.2	-8.86155		89192.6	-8.26466		101187	-8.47707		78058.9	-8.95203		113381	-9.20123
64893	-10.3168		81311.7	-8.18157		77997.6	-8.80498		89198.3	-8.16837		101190	-8.41803		78063	-8.95325		113392	-9.12834
64906.5	-10.5062		81313.6	-8.27899		78003	-8.62585		89204.1	-8.32783		101192	-8.4516		78067.1	-8.94473		113403	-9.18642
64920.3	-10.2943		81315.4	-8.31174		78008.4	-8.73958		89209.9	-8.30614		101195	-8.38463		78071.1	-8.94286		113413	-9.11759
64934.4	-10.6162		81317.3	-8.39373		78013.6	-8.80532		89215.7	-8.06738		101197	-8.44361		78075	-8.87432		113423	-9.0627
64948.9	-10.6781		81319.2	-8.48482		78018.8	-8.79119		89221.6	-8.10064		101200	-8.44287		78078.7	-8.8437		113432	-9.04339
64963.7	-10.6834		81321.1	-8.55316		78024	-9.0536		89227.5	-8.15601		101203	-8.5465		78082.2	-8.825		113440	-9.00161
64978.9	-10.7237		81323	-8.60409		78029.2	-8.90133		89233.5	-8.22935		101205	-8.40518		78085.7	-8.74223		113448	-9.11015
64994.6	-10.762		81324.9	-8.28394		78034.4	-8.67604		89239.5	-8.24332		101208	-8.46095		78089.1	-8.83254		113456	-9.03664
65010.8	-10.6869		81326.7	-8.34823		78039.5	-8.83273		89245.6	-8.25469		101210	-8.50091		78092.4	-8.90516		113464	-9.1407
65027.5	-10.829		81328.6	-8.10111		78044.7	-8.94917		89251.7	-8.42383		101213	-8.42303		78095.7	-8.89776		113473	-9.24318
65044.8	-10.8609		81330.4	-7.96686		78050	-9.08179		89257.9	-8.44229		101215	-8.43811		78099.1	-8.90539		113481	-9.18573
65062.7	-10.8704		81332.2	-8.45331		78055.2	-8.88594		89264.1	-8.16189		101218	-8.39417		78102.5	-8.91634		113491	-9.28588
65081.2	-10.9678		81334	-8.11261		78065.9	-9.52565		89270.4	-8.31307		101220	-8.48643		78106	-8.8993		113501	-9.17579
65100.4	-10.9978		81335.7	-8.10971		78076.6	-8.85673		89276.6	-8.37025		101223	-8.5348		78109.6	-9.02738		113512	-9.18898
65120.3	-11.0006		81337.4	-8.42786		78082	-8.55056		89282.7	-8.35279		101225	-8.55892		78117	-8.85676		113524	-9.11724
65140.9	-11.0051		81339	-8.20023		78087.4	-8.39357		89288.7	-8.37147		101228	-8.38473		78120.7	-9.04497		113538	-9.22855
65162.2	-10.9963		81340.7	-8.06892		78092.8	-8.38729		89294.6	-8.3692		101230	-8.42821		78124.5	-8.86867		113553	-9.27796
65184.2	-10.9634		81342.3	-8.21979		78098.3	-8.79882		89300.3	-8.26235		101233	-8.29549		78128.3	-8.91904		113570	-9.13358
65206.7	-10.9734		81343.9	-8.0671		78103.7	-8.67028		89305.8	-8.36895		101235	-8.44789		78132	-8.82665		113588	-9.12562
65229.8	-10.9936		81345.4	-8.0556		78109.1	-8.79725		89311.1	-8.41926		101238	-8.36016		78134.8	-8.88071		113608	-9.24137
65253.4	-10.9188		81347	-8.0354		78114.5	-8.81881		89316	-8.29274		101240	-8.38832		78136.6	-8.90189		113629	-9.2531
65277.5	-10.8957		81348.5	-7.94699		78119.8	-8.93345		89320.6	-8.3174		101243	-8.462		78138.4	-8.82762		113652	-9.34982
65302	-11.0351		81350	-7.96864		78125.2	-8.6487		89325	-8.21412		101246	-8.31685		78140.3	-8.80684		113675	-9.25586
65326.9	-11.1352		81351.6	-8.6755		78130.5	-8.66478		89329.2	-8.38935		101248	-8.39382		78142.1	-8.76133		113699	-9.19225
65352.1	-11.2332		81353.1	-8.57156		78135.8	-8.63932		89333.3	-8.4759		101251	-8.24362		78143.9	-8.96828		113724	-9.21083
65377.6	-11.2179		81354.6	-8.72947		78141.1	-8.38179		89337.5	-8.56443		101254	-8.36217		78145.7	-8.85673		113750	-9.37834
65403.3	-11.4167		81356.1	-8.9262		78146.4	-8.17219		89341.7	-8.74159		101256	-8.33187		78147.5	-8.91122		113775	-9.15379
65429.3	-11.2134		81357.6	-8.89285		78151.6	-8.21182		89346.1	-8.68245		101259	-8.33667		78149.3	-8.95347		113801	-9.07778
65455.4	-11.4103		81359.1	-8.7168		78156.8	-8.33231		89350.8	-8.73103		101262	-8.29272		78151.2	-8.93485		113828	-9.24715
65481.6	-11.1658		81360.5	-8.60844		78162	-8.36285		89355.9	-8.75519		101264	-8.29501		78153	-8.95835		113854	-8.89267
65507.6	-11.2955		81362	-8.70275		78167.2	-8.31378		89361.3	-8.81891		101267	-8.41122		78154.8	-8.87111		113880	-9.02178
65559.1	-11.3255		81363.4	-8.49603		78172.3	-8.35719		89367.3	-8.74683		101270	-8.31857		78156.6	-9.03434		113905	-8.91672
65584.3	-11.4242		81364.8	-8.31464		78177.3	-8.56123		89373.7	-8.80324		101272	-8.20541		78158.4	-9.0559		113930	-8.87241
65608.9	-11.3129		81366.2	-8.42024		78182.4	-8.30133		89380.4	-8.75984		101275	-8.33229		78160.2	-9.10151		113955	-8.94945
65632.8	-11.4471		81367.6	-8.14857		78187.4	-8.10725		89387.2	-8.78346		101278	-8.24211		78162	-8.81088		113980	-8.91959
65656	-11.4885		81368.9	-8.27851		78192.4	-8.27296		89394.2	-8.82882		101280	-8.34133		78163.8	-8.94918		114004	-8.87675
65678.3	-11.4774		81370.3	-8.0801		78197.4	-8.1974		89401.1	-8.91945		101283	-8.28398		78165.6	-8.6981		114028	-8.83502
65699.5	-11.473		81371.6	-8.41617		78202.4	-8.19019		89407.8	-8.67408		101285	-8.19485		78167.3	-8.67214		114053	-8.70352
65719.6	-11.1843		81372.9	-8.21201		78207.4	-8.15188		89414.2	-8.45808		101288	-8.3412		78169.1	-8.61268		114076	-8.49675
65738.5	-11.2694		81374.2	-8.2643		78212.3	-8.22979		89420.3	-8.36851		101291	-8.15792		78170.9	-8.68723		114100	-8.77975
65756	-11.2928		81375.5	-8.57277		78217.2	-8.25172		89430.8	-8.60047		101293	-8.25642		78172.7	-8.54122		114124	-8.79941
65772.2	-11.2405		81376.7	-8.53634		78222.2	-8.26711		89435.3	-8.63797		101296	-8.3461		78174.5	-8.54674		114148	-8.62168
65787.1	-11.3638		81378	-8.71351		78227.1	-8.22633		89439.1	-8.5023		101298	-8.18661		78176.4	-8.68726		114172	-8.86132
65801.1	-11.4099		81379.3	-8.89673		78232	-8.10858		89442.6	-8.52992		101301	-8.18676		78178.3	-8.61764		114195	-8.79913
65814	-11.3739		81380.6	-8.9152		78236.8	-8.03789		89445.5	-8.67151		101303	-8.36082		78180.2	-8.67197		114219	-8.84874
65826.2	-11.1906		81381.8	-8.35183		78241.7	-8.09776		89448.2	-8.57875		101306	-8.28803		78182.2	-8.46203		114243	-8.8246
65837.6	-11.1172		81383.1	-8.42195		78246.6	-8.10576		89450.5	-8.55797		101309	-8.3358		78184.1	-8.54822		114267	-8.9365
65848.6	-11.0172		81384.4	-8.30019		78251.4	-8.08137		89452.5	-8.71028		101311	-8.45335		78186	-8.56174		114290	-8.95366
65859	-10.7708		81385.7	-8.5703		78256.2	-8.21926		89454.3	-8.75009		101314	-8.38591		78187.9	-8.53603		114314	-9.04505
65869.2	-10.8005		81387.1	-8.27321		78261	-8.22235		89455.9	-8.82565		101316	-8.31422		78189.7	-8.82887		114337	-9.22253
65879.2	-10.6324		81388.4	-8.30966		78265.8	-8.24721		89457.4	-8.73681		101319	-8.37472		78191.5	-8.71558		114360	-9.11697
65889.2	-10.7098		81389.8	-8.19701		78270.6	-8.19635		89458.8	-8.62704		101321	-8.35511		78193.2	-8.80848		114383	-9.14815
65899.3	-10.6518		81391.3	-8.1133		78275.4	-7.92557		89460	-8.60711		101324	-8.3563		78194.7	-8.62751		114405	-9.00265
65909.5	-10.6448		81394.3	-8.39009		78280.1	-8.01959		89461.2	-8.62334		101326	-8.31601		78196.2	-8.70164		114427	-8.87929
65920.1	-10.6405		81395.8	-8.25729		78289.5	-8.04408		89462.4	-8.6576		101329	-8.19363		78197.6	-8.69347		114448	-8.65689
65930.9	-10.6459		81397.4	-8.55004		78298.8	-7.96956		89463.5	-8.7901		101331	-8.36909		78199	-8.83021		114469	-8.6705
65942	-10.6641		81399	-8.57394		78303.4	-8.01428		89464.5	-8.74096		101334	-8.28383		78200.2	-9.06568		114489	-8.83014
65953.2	-10.5675		81400.5	-8.37075		78308	-8.2136		89465.6	-8.89055		101336	-8.20422		78201.4	-9.01175		114509	-8.77217
65964.6	-10.5875		81402.1	-8.33042		78312.5	-8.01307		89466.6	-8.99894		101339	-8.25359		78202.5	-8.94242		114528	-8.72053
65976.2	-10.5785		81403.7	-8.2117		78317.1	-7.89348		89467.7	-9.02888		101341	-8.19656		78203.6	-8.89036		114546	-8.78037
65987.9	-10.6118		81405.2	-8.61452		78321.6	-7.77961		89468.8	-8.75986		101343	-8.06176		78204.6	-8.96173		114564	-8.68852
65999.6	-10.6495		81406.7	-8.6697		78326.1	-7.6423		89469.9	-8.79246		101346	-8.26273		78205.5	-8.97159		114581	-8.51192
66011.4	-10.5693		81408.2	-8.42876		78335	-8.11777		89471	-8.89384		101348	-8.00211		78206.3	-8.8106		114597	-8.22728
66023.3	-10.6061		81409.7	-8.23326		78339.5	-8.03169		89472.2	-8.88913		101351	-7.92561		78207	-8.72744		114613	-8.15199
66035.1	-10.6149		81411.1	-8.20149		78344	-8.01804		89475.7	-8.51468		101353	-7.93898		78207.7	-8.76113		114628	-8.32595
66046.9	-10.5884		81412.5	-8.73559		78348.5	-8.14103		89476.8	-8.56622		101355	-7.96075		78208.3	-8.76536		114642	-8.30789
66058.7	-10.591		81413.9	-8.47097		78353.1	-7.95201		89477.9	-8.41447		101358	-8.00164		78208.8	-9.04943		114655	-8.35967
66070.4	-10.547		81415.2	-8.58325		78357.6	-7.8855		89479	-8.62909		101360	-8.00041		78209.1	-8.88118		114668	-8.55694
66081.9	-10.4724		81416.6	-8.71774		78362.2	-7.9157		89480	-8.51368		101363	-7.94923		78209.3	-8.80873		114680	-8.4341
66093.4	-10.4866		81417.9	-8.65571		78366.9	-7.90665		89481	-8.36994		101365	-8.06884		78209.3	-8.8634		114691	-8.35812
66104.9	-10.4768		81419.3	-8.81427		78371.5	-7.99837		89482	-8.24789		101367	-7.94787		78209.3	-9.04537		114701	-8.43887
66116.2	-10.1753		81420.6	-8.25324		78380.9	-8.03961		89482.8	-8.30979		101370	-8.03077		78209.4	-8.91885		114711	-8.68411
66127.5	-10.3015		81422	-8.1376		78385.7	-7.89722		89483.6	-8.37218		101372	-8.09808		78209.4	-8.97324		114720	-8.8073
66138.8	-10.2966		81423.3	-8.17458		78390.5	-8.07318		89483.9	-8.36849		101375	-8.12039		78209.4	-9.16445		114729	-8.66307
66150	-10.1727		81424.7	-8.53829		78395.3	-7.98289		89484.2	-8.18157		101377	-8.07088		78209.5	-9.13477		114737	-8.93412
66161.1	-10.1537		81426.1	-8.50083		78400.2	-8.05056		89484.4	-8.26291		101379	-8.1295		78209.5	-9.14933		114744	-8.79802
66172.2	-10.2744		81427.4	-8.52912		78410.2	-8.19783		89484.5	-8.16086		101382	-8.11651		78209.5	-8.90646		114751	-8.77267
66183.3	-10.2835		81428.8	-8.4711		78415.2	-8.35274		89484.6	-8.27738		101384	-7.99844		78209.6	-8.91743		114758	-8.86067
66194.4	-10.2719		81430.1	-8.12726		78420.2	-8.15807		89484.6	-8.54717		101387	-8.01423		78209.6	-8.93699		114764	-8.98376
66205.4	-10.2911		81431.5	-8.25443		78425.2	-8.06691		89484.6	-8.51228		101389	-8.16312		78209.6	-8.97855		114770	-8.85547
66216.5	-10.2382		81432.8	-8.35446		78435.3	-8.18969		89484.6	-8.44405		101391	-8.09821		78209.7	-8.88663		114775	-8.84738
66227.5	-10.2252		81434.2	-8.3465		78440.3	-7.97779		89484.6	-8.28912		101394	-8.10661		78209.7	-9.00385		114780	-8.63146
66238.5	-10.2214		81435.5	-8.17719		78445.2	-8.11835		89484.6	-8.30104		101396	-8.12014		78209.7	-9.0944		114786	-8.64696
66249.5	-10.2645		81436.8	-7.95421		78450.2	-8.18811		89484.6	-8.33276		101398	-8.02914		78209.8	-9.04422		114791	-8.70966
66260.5	-10.2201		81438.1	-8.12161		78455.1	-8.27155		89484.6	-8.4252		101401	-7.98516		78209.8	-9.22742		114796	-8.68329
66282.6	-10.3423		81439.4	-8.16326		78460	-8.19022		89484.6	-8.58312		101403	-8.06008		78209.8	-9.42484		114801	-8.84343
66293.6	-10.3385		81440.7	-8.55858		78464.9	-8.12339		89484.6	-8.71985		101405	-8.02286		78209.9	-9.24951		114806	-9.00661
66304.7	-10.4986		81442	-8.30355		78469.8	-8.2337		89484.8	-8.53703		101407	-8.19281		78211.6	-9.26068		114811	-8.99165
66315.8	-10.4587		81443.2	-8.13214		78474.7	-8.18126		89485	-8.53386		101410	-7.87813		78214.2	-9.33794		114816	-8.99446
66326.9	-10.4914		81444.5	-8.11888		78479.5	-8.17575		89485.1	-8.57879		101412	-7.87712		78217.5	-8.96791		114821	-8.95341
66338.1	-10.4634		81445.9	-8.08655		78489.3	-8.29922		89485.2	-8.39216		101414	-8.0628		78221.5	-9.14113		114826	-8.88983
66349.3	-10.528		81447.2	-8.15468		78494.2	-8.06523		89485.6	-8.33243		101417	-7.9363		78225.9	-8.89242		114831	-8.81549
66360.6	-10.4072		81448.5	-7.96326		78499.1	-8.08063		89486.1	-8.58179		101419	-7.96729		78230.7	-8.96589		114836	-8.92602
66371.8	-10.545		81449.9	-7.9385		78504	-8.21623		89486.6	-8.44686		101422	-7.76936		78235.8	-8.94089		114842	-8.92802
66383.2	-10.5382		81451.2	-8.0482		78508.9	-8.32787		89487	-8.37447		101424	-7.78548		78241.3	-9.00006		114847	-8.77983
66394.6	-10.5495		81452.6	-8.26168		78513.8	-8.3895		89487.5	-8.31617		101427	-7.77712		78247	-8.92616		114853	-8.71793
66406	-10.7973		81454	-8.09327		78518.8	-8.36497		89487.9	-8.16182		101429	-7.80619		78252.8	-8.91595		114859	-8.93562
66417.4	-10.7288		81455.4	-8.15993		78523.7	-8.147		89488.2	-8.12799		101432	-7.97004		78258.9	-8.95937		114865	-8.99882
66428.9	-10.7576		81456.8	-8.21023		78528.6	-8.09349		89488.5	-8.27376		101435	-7.75347		78265	-9.20167		114878	-8.94228
66440.4	-10.8305		81458.3	-8.03929		78533.5	-8.12809		89488.8	-8.15247		101438	-7.85658		78271.2	-9.24936		114885	-8.9414
66452	-10.9546		81459.8	-8.12018		78543.2	-8.02686		89489	-8.10894		101441	-7.86365		78277.4	-9.30269		114891	-8.84631
66463.6	-10.8897		81461.2	-8.15442		78548.1	-8.1469		89489.3	-8.23015		101444	-7.75475		78283.6	-9.02459		114898	-8.78602
66475.3	-10.8657		81462.7	-8.46922		78552.9	-8.18591		89489.5	-8.36892		101447	-7.79817		78295	-8.92866		114905	-8.6363
66486.9	-10.8136		81464.2	-8.40771		78557.7	-8.0174		89489.7	-8.41316		101450	-7.88658		78307.6	-8.90151		114912	-8.73409
66498.6	-10.7987		81465.8	-8.33829		78562.5	-8.05239		89489.9	-8.45122		101452	-7.76012		78320.2	-8.92392		114919	-8.71882
66510.4	-10.8151		81467.3	-7.95513		78567.3	-8.05958		89490.2	-8.45013		101455	-7.95893		78332.9	-8.88133		114926	-8.71795
66522.1	-10.7356		81468.8	-7.93557		78572	-7.96151		89490.5	-8.6191		101457	-7.97617		78345.6	-8.83715		114933	-8.80104
66533.9	-10.6944		81470.3	-8.01091		78576.8	-8.26193		89490.8	-8.79954		101460	-8.27791		78358.3	-8.82501		114940	-8.66987
66545.7	-10.64		81471.9	-7.95376		78581.6	-8.349		89491.2	-8.81634		101462	-8.32763		78371	-8.80679		114947	-8.69388
66557.6	-10.6201		81473.4	-8.21043		78586.3	-8.30369		89491.6	-8.932		101464	-8.22134		78383.7	-8.72529		114953	-8.52732
66569.4	-10.6556		81474.9	-8.16232		78591.1	-7.93211		89491.9	-9.06922		101465	-8.13658		78396.5	-8.78503		114959	-8.56452
66581.3	-10.6714		81476.4	-8.09373		78596	-8.24362		89492.2	-8.93584		101466	-8.27107		78409.2	-8.66728		114966	-8.72229
66593.2	-10.7819		81477.9	-8.11014		78600.8	-8.07872		89492.5	-8.90901		101467	-8.07074		78422	-8.71238		114972	-8.65028
66605.1	-10.8333		81479.4	-8.3569		78605.6	-8.09713		89492.6	-8.69111		101467	-8.33592		78434.7	-8.7682		114977	-8.78337
66617	-10.8646		81480.9	-8.48526		78610.5	-8.05527		89492.7	-8.67045		101468	-8.23705		78447.5	-8.81411		114983	-8.95166
66628.9	-10.8392		81482.3	-8.38237		78615.3	-8.15379		89492.7	-8.70703		101468	-8.2419		78460.2	-8.61941		114989	-8.89752
66640.8	-10.7956		81483.8	-8.51443		78620.2	-8.05435		89492.7	-8.51938		101468	-8.20994		78473	-8.54094		114994	-8.87656
66652.7	-10.8419		81485.2	-8.55833		78625	-8.1231		89492.7	-8.34091		101468			78485.8	-8.62141		114999	-8.83047
66664.7	-10.8265		81486.6	-8.48547		78629.8	-8.15263		89492.7	-8.23405		101468	-8.17595		78498.6	-8.70686		115004	-8.92946
66676.6	-10.7519		81488	-8.33316		78634.7	-8.10338		89492.7	-8.33537		101468	-8.21412		78511.5	-8.74608		115009	-8.97821
66688.5	-10.8791		81489.4	-8.16592		78639.5	-8.08493		89492.8	-8.58033		101468	-8.04587		78524.4	-8.7239		115014	-8.97409
66700.4	-10.8024		81490.8	-8.08404		78644.3	-7.94818		89492.8	-8.57686		101468	-8.13092		78537.4	-8.63823		115022	-8.96736
66712.4	-10.6777		81492.2	-8.279		78649	-8.1608		89492.8	-9.00068		101468			78550.5	-8.7765		115026	-8.71539
66724.3	-10.6859		81493.6	-8.23545		78653.8	-8.08126		89492.8	-9.00955		101469	-8.14298		78563.8	-8.86874		115030	-8.59881
66736.2	-10.8232		81495	-8.36706		78658.6	-7.90302		89492.8	-8.8305		101470	-8.29321		78577.1	-8.9074		115034	-8.81806
66748.1	-10.8642		81496.3	-8.27532		78663.3	-7.96183		89492.8	-9.02998		101472	-8.31249		78590.6	-8.92803		115038	-8.72322
66760	-10.8819		81497.7	-8.18971		78668.1	-7.92177		89492.8	-9.27547		101473	-8.18422		78604.1	-8.86851		115042	-8.69621
66771.9	-10.8774		81499.1	-8.10321		78672.8	-8.033		89492.8	-9.00787		101476	-8.15355		78617.9	-8.80552		115045	-8.73421
66783.8	-10.9081		81500.5	-8.13412		78677.5	-8.10427		89492.8	-8.8979		101478	-8.22436		78631.7	-8.99795		115048	-8.60451
66795.7	-10.8815		81501.9	-8.21736		78682.3	-8.00511		89492.8	-8.82916		101481	-8.35759		78645.8	-8.96459		115052	-8.39578
66807.5	-10.8413		81503.3	-8.2613		78687	-8.0212		89492.8	-8.84674					78660	-8.99033		115055	-8.40508
66819.4	-10.8841		81504.7	-8.31652		78691.8	-7.89694		89492.8	-8.97014		102729	-8.39175		78674.3	-8.90825		115058	-8.43836
66843.1	-10.9432		81506.1	-8.35659		78701.4	-7.9466		89492.8	-9.1219		102731	-8.59425		78688.8	-8.90995		115061	-8.54235
66855	-11.0069		81507.5	-8.39381		78706.2	-8.04255		89493.1	-9.21937		102733	-8.48819		78718.4	-8.95869		115064	-8.55663
66878.7	-11.136		81509	-8.3163		78711	-7.9068		89493.7	-9.23248		102734	-8.63095		78733.4	-8.71204		115067	-8.70861
66890.5	-11.104		81510.4	-8.22313		78715.8	-8.12928		89494.4	-9.37568		102736	-8.57271		78748.6	-9.0328		115070	-8.68482
66902.3	-11.1302		81511.9	-8.2467		78720.7	-8.27617		89495.4	-9.14671		102738	-8.5013		78763.9	-8.95229		115073	-8.63411
66914	-11.0037		81513.3	-8.18415		78725.5	-7.94575		89496.6	-9.08928		102740	-8.54702		78779.4	-8.98918		115076	-8.68597
66925.8	-11.0562		81514.8	-8.13974		78730.4	-7.81037		89498	-9.02519		102742	-8.43046		78795	-8.99857		115078	-8.61869
66937.5	-10.9367		81516.2	-8.20391		78735.4	-7.9792		89499.7	-9.16303		102745	-8.55199		78810.8	-8.96703		115081	-8.68932
66960.9	-10.898		81517.6	-8.06887		78740.3	-7.91052		89502	-9.15996		102748	-8.52341		78826.8	-8.90041		115084	-8.74072
66972.5	-10.8622		81519.1	-8.02186		78745.3	-8.12665		89506.2	-9.20222		102751	-8.52315		78843	-8.61625		115087	-8.65097
66984.1	-10.757		81520.5	-8.02306		78750.3	-8.17621		89510.6	-9.4142		102754	-8.43281		78859.4	-8.62917		115089	-8.60611
66995.6	-10.7258		81521.8	-8.0233		78755.3	-8.1578		89515.4	-9.26542		102758	-8.5899		78876.1	-8.76825		115092	-8.59461
67007.2	-10.7052		81523.2	-8.06136		78760.3	-8.11201		89520.4	-9.32487		102763	-8.51949		78893.1	-8.58192		115095	-8.56933
67018.7	-10.6788		81524.6	-8.15064		78765.3	-8.02278		89525.7	-9.24797		102768	-8.50845		78910.3	-8.35601		115097	-8.35455
67030.1	-10.6584		81525.9	-8.07561		78770.3	-7.90384		89531.1	-9.1949		102774	-8.62502		78927.9	-8.34628		115100	-8.40576
67041.6	-10.5623		81527.3	-8.18304		78775.3	-7.99784		89536.8	-9.1602		102780	-8.57443		78945.7	-8.33201		115102	-8.48631
67053	-10.6835		81528.6	-8.17416		78780.2	-7.97835		89542.6	-9.05355		102786	-8.49244		78963.7	-8.32578		115105	-8.48481
67064.4	-10.7406		81530	-8.28225		78785.1	-7.95433		89548.5	-9.12381		102793	-8.53936		78981.9	-8.33541		115107	-8.57375
67075.7	-10.7826		81531.3	-8.30545		78790	-7.92007		89554.7	-9.4018		102800	-8.39739		79000.1	-8.42248		115110	-8.50645
67087.1	-10.8696		81532.7	-8.30179		78794.9	-8.05559		89561.1	-9.56463		102807	-8.30371		79018.4	-8.09204		115112	-8.57195
67098.4	-10.8896		81534.1	-8.1619		78799.7	-8.03179		89567.6	-9.6395		102813	-8.33874		79036.7	-8.01104		115115	-8.55297
67109.7	-10.9049		81535.4	-8.17865		78804.5	-8.19259		89574.4	-9.50569		102820	-8.29911		79054.9	-8.06713		115117	-8.53592
67121	-10.9808		81536.8	-7.99598		78809.3	-8.1926		89581.4	-9.48082		102827	-8.40879		79073	-8.20249		115119	-8.60542
67132.3	-11.0964		81538.2	-7.9409		78814.1	-8.20407		89588.6	-9.18788		102833	-8.29512		79091	-8.31665		115122	-8.64535
67143.5	-11.0683		81539.6	-8.0216		78818.9	-8.19958		89596.1	-9.42563		102839	-8.38846		79108.9	-8.38529		115124	-8.77802
67154.8	-11.0836		81540.9	-7.89921		78823.6	-8.25056		89603.8	-9.70219		102845	-8.42007		79126.9	-8.37071		115127	-8.82663
67166.1	-11.0638		81542.2	-8.06917		78828.4	-8.20052		89611.7	-9.77956		102849	-8.28832		79144.9	-8.3743		115129	-8.71448
67177.3	-11.0238		81543.6	-8.41574		78833.2	-8.3106		89619.7	-9.55955		102854	-8.34819		79163	-8.36389		115131	-8.67681
67188.5	-11.0515		81544.8	-8.44945		78838	-8.30844		89627.7	-9.71202		102858	-8.35712		79181.3	-8.34234		115134	-8.63276
67199.8	-11.0077		81546.1	-8.25574		78842.8	-8.29564		89635.7	-9.63686		102861	-8.38898		79199.7	-8.37568		115138	-8.65354
67211	-11.0518		81547.3	-8.25043		78847.6	-8.40357		89643.7	-9.62515		102864	-8.49603		79218.3	-8.41297		115141	-8.54907
67222.2	-10.8741		81548.5	-8.32112		78852.4	-8.29207		89648.5	-9.58218		102866	-8.47285		79237.1	-8.58408		115143	-8.84846
67233.4	-11.0056		81549.7	-8.48402		78857.2	-8.25592		89652.3	-9.55113		102868	-8.48106		79256	-8.30873		115145	-8.92231
67244.6	-11.0316		81550.8	-8.39364		78862	-8.27469		89655.9	-9.63285		102870	-8.44368		79274.9	-8.38487		115148	-9.02282
67255.8	-10.8861		81551.9	-8.30919		78866.8	-8.33106		89659.4	-9.67934		102872	-8.53166		79293.9	-8.30551		115150	-9.07854
67267	-10.9305		81553	-8.43994		78871.6	-8.33185		89662.7	-9.58221		102874	-8.53672		79312.8	-8.40538		115152	-9.09273
67278.2	-11.0035		81554.1	-8.47964		78876.4	-8.20725		89665.8	-9.49151		102875	-8.61255		79331.6	-8.33506		115154	-8.67604
67289.4	-10.9222		81555.3	-8.49055		78881.2	-8.14542		89668.7	-9.57136		102877	-8.64039		79350.2	-8.31199		115157	-8.6244
67300.5	-10.9852		81556.4	-8.48889		78885.9	-8.29817		89671.5	-9.47003		102879	-8.82411		79368.7	-8.30835		115159	-8.57615
67311.7	-11.113		81557.5	-8.25999		78890.6	-8.30437		89674.1	-9.2957		102880	-8.59626		79386.9	-8.36919		115161	-8.32298
67322.8	-10.9527		81558.7	-8.33467		78895.3	-8.3408		89676.6	-9.48109		102882	-8.57501		79405.1	-8.55083		115164	-8.21019
67334	-10.9549		81559.9	-8.53842		78900	-8.45882		89679.1	-9.63726		102884	-8.62306		79423.1	-8.29094		115166	-8.17584
67345.1	-11.005		81561	-8.46762		78904.7	-8.43109		89681.4	-9.66193		102886	-8.62876		79441.2	-8.3276		115168	-8.3145
67356.3	-11.0974		81562.2	-8.40542		78909.4	-8.4323		89683.7	-9.66012		102889	-8.72195		79459.4	-8.27115		115171	-8.52961
67367.4	-11.1847		81563.5	-8.32336		78914.1	-8.40028		89686	-9.79626		102891	-8.74946		79477.6	-8.32647		115173	-8.60956
67378.5	-11.1415		81564.7	-8.48525		78918.7	-8.51918		89688.2	-9.96004		102894	-8.63968		79496	-8.31812		115176	-8.69742
67389.6	-11.1872		81565.9	-8.43706		78923.4	-8.51444		89690.4	-9.73994		102896	-8.55913		79514.6	-8.2809		115178	-8.85139
67400.7	-11.1757		81567.1	-8.53477		78928.1	-8.66793		89692.4	-9.77513		102899	-8.62332		79533.4	-8.30497		115180	-9.05742
67411.8	-10.9815		81568.3	-8.358		78932.8	-8.65706		89694.2	-9.71025		102902	-8.78629		79552.2	-8.34242		115183	-9.01787
67422.9	-11.1		81569.5	-8.43001		78937.4	-8.6359		89695.7	-9.45024		102904	-8.77449		79571.1	-8.37775		115185	-8.96917
67434	-10.9162		81570.7	-8.45066		78942.1	-8.50568		89696.9	-9.48921		102907	-8.76296		79589.9	-8.42482		115188	-8.91159
67445	-10.9931		81571.9	-8.60521		78946.7	-8.28795		89697.7	-9.50064		102910	-8.60814		79608.7	-8.50755		115190	-8.81789
67456.1	-10.9651		81573.1	-8.56241		78951.3	-8.24893		89698	-9.64538		102912	-8.82751		79627.2	-8.41145		115192	-8.77896
67467.1	-10.9773		81574.2	-8.50923		78955.8	-8.26703		89698	-9.47971		102915	-8.84895		79645.5	-8.42633		115195	-8.83038
67478.2	-10.9716		81575.4	-8.4199		78960.3	-8.23928		89698	-9.50556		102917	-8.74167		79663.5	-8.50478		115197	-8.80553
67489.2	-11.0227		81576.6	-8.25147		78964.7	-8.16994		89698	-9.41918		102920	-8.58958		79681.3	-8.63029		115200	-8.8308
67500.2	-11.0186		81577.8	-8.22968		78969	-8.16311		89698	-9.50717		102922	-8.73844		79698.8	-8.48088		115202	-8.88812
67511.2	-10.9304		81579	-8.18805		78973.2	-8.11429		89698.1	-9.32161		102925	-8.485		79716.1	-8.61353		115205	-9.00021
67522.2	-11.1201		81580.2	-8.29572		78977.3	-8.16621		89698.1	-9.39385		102927	-8.64046		79733.3	-8.66861		115208	-8.91513
67533.2	-11.1763		81581.5	-8.43638		78981.3	-8.20396		89698.1	-9.26776		102929	-8.81321		79750.3	-8.68381		115210	-8.81306
67544.2	-11.0997		81582.7	-8.4829		78985.3	-8.30966		89698.1	-9.15841		102932	-8.82246		79767.3	-8.75904		115213	-8.77408
67555.2	-11.156		81584	-8.44988		78989.2	-8.26715		89698.1	-9.16925		102934	-8.77373		79784.2	-8.27519		115215	-8.47859
67566.2	-11.3031		81585.3	-8.38496		78993	-8.24945		89698.1	-9.121		102937	-8.77183		79801.1	-8.3931		115218	-8.39934
67577.2	-11.2941		81586.6	-8.14018		78996.9	-8.06739		89698.1	-9.32916		102939	-8.73285		79818	-8.32068		115220	-8.52546
67588.1	-11.2753		81587.9	-8.20902		79000.8	-8.05105		89698.1	-9.23926		102941	-8.61854		79834.9	-8.3877		115223	-8.551
67599.1	-11.2632		81589.2	-8.37561		79004.7	-8.1442		89698.1	-9.14989		102944	-8.88977		79851.8	-8.61273		115226	-8.72155
67610.1	-11.3513		81590.6	-8.3448		79008.6	-8.20386		89698.1	-9.32332		102946	-8.88712		79868.8	-8.48855		115228	-8.74789
67621	-11.335		81591.9	-8.38913		79012.7	-8.16417		89698.1	-9.32667		102949	-8.77841		79885.7	-8.37892		115231	-8.66552
67632	-11.3493		81593.2	-8.44004		79016.8	-8.14905		89698.1	-9.19521		102951	-8.6679		79902.7	-8.21896		115233	-8.5755
67642.9	-11.3476		81594.5	-8.35561		79021	-8.08761		89698.1	-9.12369		102954	-8.60205		79919.7	-8.5027		115236	-8.45986
67653.9	-11.3411		81595.8	-8.28266		79025.2	-8.08767		89698.1	-9.29721		102956	-8.85811		79936.8	-8.41671		115238	-8.69554
67664.8	-11.2216		81597	-8.24693		79029.6	-8.0822		89698.1	-9.16577		102959	-8.70143		79953.9	-8.51784		115241	-8.81743
67675.7	-11.2371		81598.3	-8.21544		79034	-8.01276		89698.1	-8.87034		102961	-8.80928		79971	-8.35167		115243	-8.87075
67686.6	-11.2995		81599.5	-8.24392		79038.4	-8.09105		89698.1	-8.78825		102964	-8.75548		79988.2	-8.46399		115246	-8.91018
67697.5	-11.2514		81600.8	-8.13408		79042.9	-8.01638		89698.1	-8.91103		102967	-8.71907		80005.3	-8.39001		115248	-8.75454
67708.4	-11.2335		81602	-7.91497		79047.4	-8.01267		89698.1	-8.86146		102969	-8.62577		80022.5	-8.36335		115251	-8.69928
67719.3	-11.1532		81603.3	-7.83801		79051.9	-7.92465		89698.1	-8.84533		102972	-8.64022		80039.7	-8.26794		115253	-8.69729
67730.2	-11.2332		81604.5	-7.89167		79056.4	-8.00313		89698.1	-8.70976		102974	-8.58391		80056.8	-8.36988		115256	-8.51217
67741.1	-11.2099		81605.8	-8.02234		79060.9	-8.1459		89698.1	-8.6242		102977	-8.63896		80074	-8.49664		115258	-8.64861
67752	-11.2091		81607.1	-8.02662		79065.4	-7.93966		89698.1	-8.62558		102979	-8.71199		80091.2	-8.47224		115260	-8.48553
67762.8	-11.2885		81608.3	-8.10971		79069.9	-7.99209		89698.1	-8.90372		102982	-8.70698		80108.3	-8.3328		115263	-8.49062
67773.7	-11.2096		81609.6	-7.99257		79074.4	-7.99823		89698.1	-9.04261		102984	-8.78859		80125.4	-8.54511		115265	-8.41852
67784.5	-11.0202		81610.9	-8.02113		79078.9	-7.98639		89698.1	-8.49006		102987	-8.72216		80142.4	-8.40595		115267	-8.44437
67795.3	-10.9671		81612.3	-7.967		79083.3	-8.09974		89698.1	-8.35539		102989	-8.79449		80159.3	-8.32391		115269	-8.69196
67806.1	-10.7977		81613.6	-7.975		79087.8	-8.07661		89698.1	-8.54387		102992	-8.77485		80176.2	-8.28591		115271	-8.73068
67816.9	-10.7036		81614.9	-7.87994		79092.3	-8.09398		89698.1	-8.41201		102994	-8.59202		80193	-8.20296		115273	-8.70522
67827.7	-10.6936		81616.2	-7.86689		79096.7	-8.13632		89698.1	-8.24686		102997	-8.62164		80209.7	-8.20693		115275	-8.83358
67838.4	-10.6638		81617.6	-8.03851		79101.1	-7.99751		89698.1	-8.18788		102999	-8.58552		80226.3	-8.29379		115277	-8.79838
67849.2	-10.7942		81618.9	-8.16179		79105.5	-8.17345		89698.1	-8.31646		103001	-8.63819		80242.9	-8.41328		115279	-8.82194
67859.9	-10.764		81620.3	-8.0015		79109.9	-8.06036		89698.1	-8.30038		103004	-8.72062		80259.4	-8.43312		115281	-8.57376
67870.6	-10.7562		81621.6	-7.97957		79114.3	-7.91111		89698.1	-8.48676		103006	-8.73801		80275.9	-8.37252		115283	-8.46229
67881.3	-10.8208		81623	-7.79393		79118.7	-8.05782		89698.1	-8.42696		103009	-8.88169		80292.4	-8.28802		115285	-8.48221
67892	-10.7878		81624.3	-7.76473		79123	-8.05717		89698.1	-8.12804		103012	-8.85902		80308.9	-8.12162		115287	-8.46987
67902.7	-10.675		81625.7	-7.97589		79127.3	-7.9576		89698.1	-8.27924		103014	-8.6797		80325.5	-8.18953		115288	-8.25909
67913.3	-10.7187		81627	-8.02422		79131.6	-8.02967		89698.1	-8.60417		103017	-8.79439		80342.1	-8.32764		115289	-8.53877
67924	-10.6752		81628.4	-8.0909		79135.8	-7.98952		89698.1	-8.81115		103019	-8.98815		80358.8	-8.28499		115290	-8.79427
67934.6	-10.786		81629.7	-7.86629		79140	-7.90953		89698.1	-8.37124		103022	-8.92472		80375.5	-8.28284		115291	-8.45267
67945.3	-10.8117		81631.1	-7.766		79144.1	-7.92509		89698.1	-8.42865		103025	-8.73173		80392.3	-8.3182		115292	-8.51348
67955.9	-10.851		81632.4	-7.86054		79148.2	-7.88338		89698.1	-8.37473		103027	-8.76039		80409.1	-8.2034		115293	-8.52182
67966.6	-10.6284		81633.8	-7.94811		79152.3	-7.71336		89698.2	-8.34485		103030	-8.80205		80425.9	-8.33445		115294	-8.45994
67977.2	-10.5751		81635.1	-7.92067		79156.3	-7.86766		89698.2	-8.34058		103033	-8.69518		80459.7	-8.23769		115295	-8.23969
67987.9	-10.6639		81636.4	-7.8497		79160.3	-7.94756		89698.2	-8.23724		103036	-8.64515		80476.6	-8.3494		115296	-8.96033
67998.6	-10.5355		81637.8	-7.62177		79164.4	-8.01788		89698.2	-8.37646		103038	-8.68905		80493.5	-8.26958		115297	-9.23334
68009.2	-10.5098		81639.1	-7.58201		79168.4	-7.88203		89698.2	-8.50222		103041			80510.4	-8.30502		115298	-9.22421
68019.9	-10.506		81640.4	-7.64621		79172.5	-7.98779		89698.2	-8.47462		103044	-8.49706		80527.4	-8.26737		115298	-8.9822
68030.7	-10.4416		81641.7	-7.68333		79176.7	-7.95936		89698.2	-8.32439		103046	-8.65502		80544.3	-8.42538		115299	-9.30836
68041.4	-10.3836		81643.1	-7.74779		79180.9	-7.90942		89698.2	-7.9729		103049	-8.76583		80561.3	-8.33222		115299	-9.28593
68052.1	-10.393		81644.4	-7.86565		79185.2	-7.68903		89698.2	-7.98352		103052	-8.9147		80578.2	-8.39433		115299	-9.4159
68062.9	-10.4627		81645.7	-7.88399		79189.6	-7.83243		89698.2	-7.85462		103054	-8.75637		80612	-8.44411		115299	-9.24656
68073.6	-10.4517		81647	-8.05558		79194.1	-7.89824		89698.2	-8.11251		103057	-8.82969		80628.8	-8.55811		115299	-9.07199
68084.4	-10.4862		81648.4	-7.95634		79198.6	-7.84789		89698.2	-8.25874		103059	-8.85582		80645.7	-8.48862		115300	-9.1611
68095.2	-10.519		81649.7	-7.94851		79203.1	-7.96446		89698.2	-8.21916		103062	-8.71893		80662.5	-8.42209		115300	-9.07844
68105.9	-10.3468		81651	-7.93228		79207.7	-7.88057		89698.2	-8.23875		103064	-8.72993		80679.4	-8.42621		115300	-9.02282
68116.7	-10.4759		81652.4	-7.84525		79212.3	-8.0172		89698.2	-8.10491		103067	-8.76301		80696.3	-8.39647		115300	-9.05063
68127.5	-10.4783		81653.7	-7.57164		79221.5	-8.09824		89698.2	-8.12811		103069	-8.75111		80713.3	-8.37501		115300	-8.98263
68138.3	-10.1633		81655	-7.61669		79226	-7.89383		89698.2	-8.09258		103072	-8.66653		80730.2	-8.32172		115300	-9.11071
68149.1	-10.2469		81656.3	-7.72847		79230.4	-7.88261		89698.2	-8.10556		103074	-8.67759		80747.3	-8.36682		115300	-9.16448
68159.8	-10.2312		81657.6	-8.01105		79234.8	-8.06473		89698.2	-8.19988		103077	-8.74059		80764.3	-8.18429		115300	-9.16418
68170.6	-10.2711		81658.9	-7.93968		79239.2	-8.06536		89698.2	-8.45118		103079	-8.75363		80781.4	-8.33975		115300	-9.21986
68181.4	-10.166		81660.1	-7.91126		79243.7	-7.90746		89698.2	-8.30082		103082	-8.794		80798.5	-8.25933		115300	-9.2905
68192.2	-10.0732		81661.4	-7.93691		79248.3	-7.93799		89698.2	-8.41104		103085	-8.72574		80815.6	-8.39375		115300	-9.29163
68202.9	-10.0094		81662.6	-7.73382		79253.1	-7.88212		89698.2	-8.40443		103087	-8.76537		80832.6	-8.41027		115300	-9.16463
68213.7	-10.0629		81663.8	-7.72099		79258.2	-7.7701		89698.2	-8.27817		103090	-8.74033		80849.7	-8.46375		115300	-9.07067
68224.5	-10.0664		81665.1	-7.57511		79263.6	-7.99166		89698.2	-8.2413		103092	-8.7093		80866.6	-8.56725		115300	-9.09758
68235.3	-10.0707		81666.3	-7.82557		79269.5	-8.00349		89698.2	-8.18565		103095	-8.7863		80883.5	-8.47022		115300	-8.87029
68246.1	-10.1463		81667.5	-7.97524		79275.9	-7.95047		89698.2	-8.18771		103097	-8.85241		80900.3	-8.49506		115300	-8.98044
68257	-10.0861		81668.7	-8.01855		79282.9	-8.08971		89698.2	-8.19252		103100	-8.73672		80917.1	-8.47737		115300	-9.14804
68267.8	-10.0451		81670	-8.06536		79290.6	-7.78686		89698.2	-8.39426		103102	-8.86073		80933.8	-8.4024		115300	-9.10499
68278.7	-10.0326		81671.2	-8.17591		79298.8	-7.73933		89698.2	-8.24996		103105	-8.85033		80950.5	-8.30099		115300	-8.98884
68289.5	-10.0565		81672.5	-8.16775		79307.6	-7.94909		89698.2	-8.51715		103107	-8.80966		80967.2	-8.23862		115300	-8.90079
68300.4	-10.1311		81673.9	-8.21653		79316.9	-7.99354		89698.2	-8.56631		103110	-8.69564		80983.9	-8.22254		115300	-8.76765
68311.4	-10.1045		81675.2	-8.12581		79326.8	-8.17068		89698.2	-8.60799		103113	-8.76167		81000.6	-8.05251		115300	-8.7931
68322.3	-10.2097		81676.5	-8.05803		79337	-8.07496		89698.2	-8.82649		103115	-8.73955		81017.3	-8.055		115300	-8.89912
68333.3	-10.1364		81677.9	-8.09384		79347.7	-7.98595		89698.2	-8.8394		103118	-8.6948		81034.1	-8.0868		115300	-9.12333
68344.2	-10.1421		81679.2	-7.67916		79358.8	-7.82867		89698.2	-8.64427		103120	-8.7939		81050.9	-8.05145		115301	-9.33902
68355.2	-10.0891		81680.6	-7.68791		79370.1	-7.86656		89698.2	-8.18998		103123	-8.81328		81067.7	-8.02958		115303	-9.4376
68366.2	-9.98238		81681.9	-7.79651		79381.7	-7.76683		89698.8	-8.12585		103125	-8.72366		81084.5	-8.08775		115304	-9.41197
68377.3	-10.1545		81684.4	-8.1606		79393.6	-7.89904		89699.8	-8.53848		103127	-8.76432		81101.3	-8.17651		115305	-9.34095
68388.3	-10.329		81685.6	-8.21194		79405.8	-8.04457		89701	-8.5355		103130	-8.76956		81118.1	-8.15136		115307	-9.18948
68399.3	-10.2984		81686.7	-8.28869		79418.4	-7.89893		89702.5	-8.31524		103132	-8.72878		81134.9	-8.10497		115308	-9.33629
68410.3	-10.1779		81687.8	-8.15258		79431.3	-7.9427		89704	-8.22971		103135	-8.82492		81151.7	-8.15318		115309	-9.58262
68421.3	-10.2386		81688.9	-8.08317		79444.7	-8.03425		89705.7	-8.37136		103137	-8.75696		81168.5	-8.20397		115310	-9.27225
68432.3	-10.1122		81690	-8.21541		79458.7	-7.94798		89707.4	-8.16812		103140	-8.68374		81185.4	-8.1904		115311	-9.19047
68443.3	-10.1586		81691	-8.38026		79473.3	-8.06093		89709	-8.15341		103142	-8.73947		81202.2	-8.22592		115312	-9.23883
68454.3	-10.1958		81692	-8.10459		79488.5	-8.02871		89710.6	-8.271		103144	-8.78886		81219.1	-8.19762		115312	-9.26588
68465.3	-10.2719		81693.1	-8.03143		79504.4	-7.9251		89712.1	-8.50635		103147	-8.70885		81236	-8.12001		115312	-9.18961
68476.3	-10.2921		81694.1	-8.05738		79521.1	-8.05273		89713.5	-8.5016		103149	-8.77231		81252.9	-8.14245		115312	-9.11729
68487.3	-10.2579		81695.2	-8.04305		79538.5	-7.94169		89714.8	-8.53572		103152	-8.85232		81269.9	-8.11361		115312	-9.2687
68498.2	-10.2708		81696.4	-8.1089		79556.6	-7.99649		89716	-8.47765		103154	-8.88524		81286.9	-8.15269		115312	-9.19458
68509.2	-10.3537		81698.9	-8.15424		79575.1	-7.91392		89717.1	-8.40914		103157	-8.84832		81303.9	-8.16077		115312	-9.16472
68520.2	-10.3975		81700.2	-8.20334		79593.7	-7.79087		89718.1	-8.71642		103159	-8.76353		81321	-8.05154		115313	-9.15882
68531.1	-10.3587		81701.5	-8.15405		79612.4	-7.81411		89718.9	-8.57046		103162	-8.79757		81338	-8.10973		115313	-9.00279
68542.1	-10.5409		81702.9	-8.08203		79630.7	-7.78082		89719.5	-8.52875		103164	-8.78247		81355	-8.11706		115313	-8.96441
68553.1	-10.5256		81704.3	-8.13992		79648.7	-8.02187		89720	-8.70171		103167	-8.88042		81372.1	-8.08847		115313	-8.98833
68564.1	-10.5752		81705.7	-8.06011		79665.9	-7.92559		89720.3	-8.3756		103169	-8.8538		81389	-8.09132		115313	-9.0498
68575.1	-10.5931		81707.2	-7.96283		79682.3	-7.76509		89720.6	-8.2175		103172	-8.90156		81405.9	-8.09212		115313	-9.06389
68586.1	-10.6195		81708.6	-7.9688		79697.5	-7.93342		89720.8	-7.79481		103174	-8.95184		81422.7	-8.15523		115313	-9.29042
68597.2	-10.6111		81710	-8.05782		79711.5	-7.92633		89721	-8.12942		103177	-8.95428		81439.5	-8.07436		115313	-9.33443
68608.2	-10.7492		81711.5	-8.06755		79724.2	-7.80636		89721.2	-8.84016		103179	-9.06661		81456.2	-8.12999		115313	-9.27839
68619.3	-10.7393		81712.9	-8.04302		79735.8	-7.76829		89721.5	-8.71185		103182	-9.02773		81472.9	-8.1599		115313	-9.11588
68630.4	-10.6412		81714.3	-7.95232		79746.3	-7.89957		89721.9	-8.26917		103184	-9.05683		81489.5	-8.17946		115313	-9.1507
68641.5	-10.5607		81715.7	-8.10459		79755.8	-7.87949		89722.5	-8.21457		103187	-8.87659		81506.2	-8.17624		115313	-9.18728
68652.6	-10.6626		81717.1	-7.89958		79764.3	-7.89815		89723.3	-8.46144		103189	-9.02918		81522.8	-8.10317		115313	-9.11858
68663.7	-10.6953		81718.5	-7.9572		79772	-7.72503					103192	-8.92675		81539.5	-8.07661		115313	-9.15917
68674.8	-10.7222		81719.9	-7.89209		79778.9	-7.82145					103194	-8.84773		81556.2	-8.11646		115313	-9.43742
68685.9	-10.696		81721.3	-7.88525		79785	-7.80131					103197	-8.85433		81572.9	-8.09245		115313	-9.41983
68708.1	-10.8069		81722.7	-7.88232		79790.6	-7.91695					103199	-8.90256		81589.6	-7.99755		115313	-9.25962
68719.2	-10.8848		81724.1	-7.87827		79795.6	-7.91429					103202	-8.87307		81606.3	-8.16494		115313	-9.31717
68730.3	-10.9278		81725.5	-7.92167		79800	-7.86486					103204	-8.89438		81623.1	-8.04942		115313	-9.30755
68741.4	-10.9514		81726.9	-8.10582		79804.1	-7.83879					103207	-8.90032		81639.8	-7.98095		115313	-9.30061
68752.4	-10.8951		81728.3	-7.97887		79807.7	-7.88146					103209	-8.91597		81656.5	-8.04813		115313	-9.29238
68763.5	-10.8696		81729.8	-8.01266		79810.9	-8.01904					103212	-8.94561		81673.1	-8.05239		115313	-9.56517
68774.6	-10.8694		81731.2	-8.08523		79813.9	-7.88763					103214	-8.88024		81689.8	-8.02255		115313	-9.46111
68785.6	-10.864		81732.7	-8.02156		79816.5	-8.03396					103217	-8.88532		81706.4	-8.00321		115313	-9.70069
68796.6	-10.9645		81734.2	-7.87881		79819	-7.85416					103219	-8.88807		81723	-8.0534		115313	-9.41409
68807.7	-10.8436		81735.7	-7.93148		79821.3	-7.87647					103222	-8.83696		81739.6	-8.07729		115313	-9.28115
68818.7	-10.9339		81737.2	-7.87954		79823.5	-8.01512					103224	-8.79763		81756.2	-8.1796		115313	-9.2106
68829.8	-11.0056		81738.8	-7.9946		79825.7	-8.05825					103227	-8.87063		81772.8	-8.09005		115313	-8.9917
68840.9	-10.8838		81740.4	-7.99064		79827.7	-7.92984					103229	-8.9249		81789.5	-8.16321		115313	-9.06493
68852	-10.8276		81742.1	-7.93656		79829.8	-7.98499					103231	-8.8642		81806.3	-8.0912		115313	-9.07172
68863.1	-10.9081		81744	-8.17856		79831.8	-8.00146					103234	-8.861		81823.1	-8.05647		115313	-8.95644
68874.2	-10.8255		81746	-8.13951		79833.8	-7.91757					103236	-8.93571		81840	-8.15755		115313	-8.98933
68885.4	-10.9006		81748.3	-8.232		79835.8	-8.02986					103239	-8.82536		81857	-8.12977		115313	-8.98252
68896.6	-10.8113		81750.9	-8.22138		79837.8	-7.8542					103241	-8.85913		81874	-8.10351		115316	-8.8866
68907.8	-10.8065		81753.8	-8.13203		79839.8	-7.9368					103244	-8.92253		81891	-8.03105		115321	-8.85025
68919.1	-10.7956		81757.2	-8.19617		79841.9	-8.07057					103246	-8.93401		81907.9	-8.07663		115328	-8.80573
68930.4	-10.8164		81761	-8.01849		79844	-8.0704					103249	-8.92521		81924.9	-8.20394		115340	-8.72299
68941.7	-10.9012		81765.3	-7.79704		79846.2	-8.11841					103251	-8.95946		81941.8	-8.17527		115367	-8.96302
68953.1	-10.9694		81770.2	-7.83571		79848.5	-7.92113					103254	-8.97515		81958.7	-8.20039		115402	-8.96779
68964.6	-10.9686		81775.5	-7.89904		79850.8	-8.08389					103256	-8.96335		81975.6	-8.24245		115445	-8.98303
68976.1	-11.0511		81781.4	-7.7956		79853.1	-8.01109					103259	-8.96881		81992.4	-8.31775		115495	-9.0886
68987.6	-11.0105		81787.7	-7.87732		79855.5	-8.05436					103261	-8.97287		82009.2	-8.25956		115550	-9.20584
68999.2	-10.8802		81794.4	-7.94602		79857.9	-8.00461					103264	-8.97195		82042.7	-8.21206		115610	-9.25208
69010.9	-10.7746		81801.5	-7.97839		79860.3	-8.16799					103266	-8.93066		82059.5	-8.37426		115673	-9.31385
69022.6	-10.8102		81808.9	-7.94065		79862.8	-8.06484					103269	-9.03039		82076.3	-8.2468		115737	-9.46646
69034.4	-10.8647		81816.5	-8.00027		79865.3	-8.0075					103271	-8.98575		82093.2	-8.41813		115803	-9.47336
69058.2	-10.9397		81824.4	-7.69982		79867.7	-7.92213					103274	-8.79859		82110	-8.20532		115867	-9.43562
69070.2	-10.9159		81832.5	-7.68151		79870.2	-7.86646					103276	-8.96659		82126.9	-8.34475		115930	-9.08121
69082.2	-10.7537		81840.7	-7.91778		79872.7	-7.95759					103279	-8.84093		82143.8	-8.27396		116012	-8.95952
69094.4	-10.9191		81849.1	-7.81186		79875.2	-8.15745					103282	-8.93018		82160.7	-8.28748		116036	-8.94328
69106.5	-10.7705		81857.6	-7.72867		79877.7	-8.13923					103284	-9.12642		82177.7	-8.32474		116057	-9.06282
69118.7	-10.805		81866.1	-7.60377		79880.2	-8.1278					103287	-8.97654		82194.7	-8.45974		116074	-9.28825
69131	-10.9343		81874.7	-7.51473		79882.8	-8.19051					103290	-8.87375		82211.8	-8.45723		116087	-9.46591
69143.3	-11.0014		81883.4	-7.6711		79885.3	-8.21069					103292	-8.85395		82228.8	-8.31125		116096	-9.45371
69155.6	-10.8787		81892	-7.8037		79887.9	-8.21624					103295	-8.88605		82245.9	-8.37398		116101	-9.44756
69168	-10.9726		81900.7	-7.91064		79890.4	-8.3356					103298	-8.95521		82263	-8.37951		116104	-9.27542
69180.4	-10.9153		81909.2	-7.92826		79893	-8.19151					103301	-8.89167		82280.1	-8.30468		116104	-9.45507
69192.8	-10.8368		81917.8	-7.8592		79895.6	-8.24292					103303	-8.79292		82297.1	-8.27241		116104	-9.4299
69205.2	-10.9713		81926.2	-8.07108		79898.2	-8.13459					103306	-8.90198		82314.1	-8.28336		116104	-9.41603
69217.6	-10.8893		81934.6	-8.08085		79900.9	-8.04539					103309	-8.91733		82331	-8.44915		116104	-9.35601
69230	-10.9225		81943.2	-8.04185		79903.5	-8.09828					103312	-8.91224		82347.9	-8.41475		116104	-9.0882
69242.5	-10.8442		81951.9	-8.20486		79906.2	-8.05598					103315	-8.98684		82381.3	-8.32455		116104	-9.2764
69267.3	-11.0308		81960.9	-7.96485		79908.8	-8.27789					103318	-8.93351		82398	-8.31053		116104	-9.41579
69279.7	-10.9557		81970.3	-7.84627		79911.5	-8.48234					103321	-8.94011		82414.6	-8.2812		116104	-9.21742
69292.1	-11.0161		81980.1	-7.64336		79914.1	-8.44803					103324	-8.77094		82431.1	-8.28706		116104	-9.26726
69304.4	-10.9768		81990.5	-7.64162		79916.7	-8.35704					103327	-8.94345		82447.7	-8.23456		116104	-9.15123
69316.7	-10.9649		82001.5	-7.67812		79919.4	-8.16303					103330	-8.83678		82464.2	-8.10955		116104	-9.1025
69329	-10.956		82013.3	-7.60157		79922	-8.14369					103333	-8.89772		82480.8	-8.04482		116104	-9.11462
69341.3	-10.9936		82025.9	-7.72828		79924.6	-8.08234					103336	-9.02436		82497.3	-8.18658		116104	-9.16359
69353.5	-10.8629		82039.1	-7.69623		79927.2	-8.14019					103339	-9.05587		82514	-8.18809		116104	-9.26636
69365.6	-10.9344		82052.6	-7.91768		79929.8	-8.13892					103342	-8.93408		82530.6	-8.12213		116104	-9.28992
69377.7	-11.3405		82066.3	-8.02187		79932.3	-8.34962					103345	-8.91973		82547.3	-8.07857		116104	-9.36223
69389.7	-11.3563		82080	-8.02823		79934.9	-8.21836					103348	-9.03005		82564	-8.26444		116104	-9.33611
69401.7	-11.6137		82093.3	-7.83001		79937.5	-8.17242					103350	-9.03735		82580.7	-8.1768		116104	-9.38242
69413.6	-11.7798		82106.1	-7.73528		79940.1	-8.24668					103353	-9.04989		82597.4	-7.91225		116104	-9.32661
69425.4	-11.7558		82118.2	-7.82257		79942.7	-8.13639					103356	-9.06474		82614.2	-7.98715		116104	-9.05771
69437.2	-11.7945		82129.3	-7.9214		79945.4	-8.16281					103359	-9.02598		82631	-8.07885		116104	-9.20738
69449	-11.6717		82139.2	-7.88236		79948	-8.09299					103361			82647.7	-8.12367		116104	-9.35636
69460.8	-11.7199		82147.7	-7.94846		79950.7	-8.31024					103364	-8.98888		82664.4	-8.16414		116104	-9.41995
69472.5	-11.6676		82154.9	-7.76646		79953.4	-8.21798					103367	-8.982		82681	-8.28793		116104	-9.25784
69484.1	-11.6973		82161	-7.89178		79956.1	-8.24179					103369	-8.877		82697.3	-8.0825		116104	-9.08259
69495.7	-11.6822		82166.2	-8.09674		79958.8	-8.27125					103372	-8.94158		82713.5	-7.83546		116105	-9.0339
69507.4	-11.5608		82170.5	-7.98908		79961.6	-8.27238					103374	-8.82653		82729.3	-8.06533		116107	-9.1074
69518.9	-11.5304		82174.1	-7.98077		79964.4	-8.17138					103377	-8.92034		82744.9	-8.06601		116109	-9.17654
69530.5	-11.4092		82177.3	-7.75686		79967.2	-8.18183					103379	-8.95621		82760	-8.27586		116111	-9.08999
69542	-11.4089		82180.1	-7.95289		79970.1	-8.18242					103381	-8.95432		82774.9	-8.34197		116114	-8.99446
69553.6	-11.2937		82182.7	-7.98131		79973	-8.17517					103384			82789.7	-8.35432		116117	-9.44312
69565.1	-11.2671		82185.3	-7.96394		79975.9	-8.3019					103386	-8.9057		82804.3	-8.48971		116120	-9.42049
69576.7	-11.1737		82187.9	-7.9967		79978.9	-8.56703					103388	-8.85614		82819	-8.469		116123	-9.41919
69588.4	-11.1978		82190.7	-8.02067		79981.9	-8.67441					103391	-8.93987		82833.9	-8.45418		116127	-9.37518
69600	-10.9486		82193.4	-7.94534		79984.9	-8.68744					103393	-8.96974		82848.9	-8.49392		116130	-9.22597
69611.8	-10.7471		82196.1	-7.95983		79987.9	-8.32551					103396	-8.90351		82864.3	-8.38837		116134	-9.18497
69623.6	-10.6563		82198.8	-7.89835		79991	-8.13854					103398	-8.92368		82880.1	-8.41267		116137	-9.38342
69635.6	-10.4564		82201.3	-7.97519		79994	-8.26109					103400	-8.91529		82896.3	-8.55066		116141	-9.37471
69647.6	-10.7482		82203.8	-7.87059		79997.1	-8.31629					103403	-8.78523		82912.7	-8.5066		116144	-9.05817
69659.8	-10.7137		82206	-7.78268		80000.1	-8.21039					103405	-8.70813		82929.4	-8.32661		116148	-9.20407
69672.1	-10.8128		82207.9	-7.64789		80003.1	-8.13911					103407	-8.75418					116151	-9.03197
69684.6	-10.7894		82209.6	-8.00948		80006.1	-8.24346					103410	-8.89833		94522.6	-9.94718		116155	-9.15398
69697.2	-10.6971		82211	-7.91636		80009.1	-8.18243					103412	-9.0727		94543.1	-9.71272		116158	-9.02167
69710	-10.7652		82212.1	-7.71732		80012	-8.32497					103414	-9.05252		94563.6	-9.0138		116162	-9.1681
69722.9	-10.6999		82213	-7.79733		80014.9	-8.27801					103417	-8.83979		94584.1	-9.03838		116166	-9.09726
69749.1	-10.7303		82213.8	-7.86256		80017.8	-8.30239					103419	-8.72371		94604.6	-9.43931		116170	-9.09541
69762.4	-10.5704		82214.6	-7.93313		80020.7	-8.46844					103421	-8.95908		94625.2	-9.60861		116174	-9.20043
69775.8	-10.5541		82215.3	-7.72854		80023.6	-8.61418					103424	-9.02343		94645.8	-9.42429		116178	-9.21357
69802.7	-10.7781		82216.2	-7.72471		80026.5	-8.36917					103426	-8.77713		94666.4	-9.19768		116182	-9.19559
69816.3	-10.7338		82217.2	-7.7067		80029.3	-8.28035					103429	-8.7368		94687.1	-9.06193		116187	-9.30124
69829.8	-10.8244		82218.4	-7.74864		80032.2	-8.39311					103431	-8.87065		94707.8	-9.06949		116191	-9.3902
69843.4	-10.7597		82219.9	-8.00929		80035	-8.4809					103433	-8.88212		94728.6	-9.13045		116196	-9.30705
69857.1	-10.8721		82221.7	-8.12089		80037.9	-8.47529					103436	-8.95537		94749.3	-9.08146		116201	-9.29481
69870.7	-10.9892		82223.8	-8.05892		80040.7	-8.40289					103438	-9.011		94770	-9.11449		116206	-9.43264
69884.3	-11.0056		82226.2	-7.86891		80043.5	-8.30176					103440	-8.83455		94790.6	-9.0661		116211	-9.28087
69897.8	-11.0199		82228.8	-7.94393		80046.3	-8.34511					103442	-9.07334		94811.1	-9.20249		116216	-9.44975
69911.2	-11.0403		82231.6	-8.06077		80049.1	-8.28585					103445	-9.14908		94831.4	-9.1718		116221	-9.46451
69924.6	-11.0344		82234.4	-8.14825		80051.7	-8.39346					103447	-9.05767		94851.6	-9.17483		116226	-9.38034
69937.8	-10.9579		82237.4	-8.24445		80054.4	-8.32546					103449	-9.07703		94871.5	-9.13158		116236	-9.31874
69950.9	-11.1108		82240.3	-8.09546		80056.9	-8.52655					103451	-9.03905		94891.3	-9.00615		116247	-9.41471
69963.9	-11.1173		82243.2	-7.9611		80059.4	-8.43121					103454	-9.16848		94910.9	-8.98848		116258	-9.28225
69976.6	-11.1396		82246.1	-7.98938		80061.8	-8.30916					103456	-9.17102		94930.4	-8.91419		116269	-9.1364
69989.1	-11.1204		82248.8	-8.06123		80064.1	-8.07808					103458	-9.3217		94949.7	-8.94425		116281	-9.39732
70001.4	-11.1852		82251.4	-8.04419		80066.4	-8.13737					103460	-9.22966		94969	-8.92321		116292	-9.23642
70013.4	-11.1622		82253.9	-8.08566		80068.6	-8.13772					103462	-9.12406		94988.2	-9.02859		116304	-9.16387
70025.1	-11.1463		82256.4	-8.18512		80070.8	-8.1489					103464	-9.16959		95007.3	-9.05892		116316	-9.2181
70036.5	-11.083		82258.8	-7.95708		80073	-8.17319					103466	-9.17276		95026.5	-9.01561		116327	-9.31013
70047.6	-11.0406		82261.2	-8.26352		80075.1	-8.11912					103468	-9.20933		95045.6	-9.00109		116339	-9.26369
70058.4	-11.1366		82263.6	-8.25049		80077.2	-8.30374					103470	-9.26855		95064.7	-8.92177		116351	-9.17548
70068.9	-11.0623		82266.1	-8.34652		80079.4	-8.30818					103472	-9.432		95083.8	-8.91576		116363	-9.29391
70079.2	-11.1494		82268.6	-8.29829		80081.5	-8.2952					103473	-9.37535		95102.9	-8.96801		116375	-9.16299
70089.3	-11.0991		82271.2	-8.14996		80083.7	-8.2735					103475	-9.3765		95122.1	-8.90679		116387	-9.10653
70099.3	-11.1464		82273.9	-8.15464		80085.9	-7.9719					103477	-9.48265		95141.3	-8.9676		116398	-9.07296
70109	-11.0946		82276.6	-8.15805		80088.1	-8.01983					103478	-9.487		95160.5	-8.9892		116410	-9.21331
70118.7	-11.1349		82279.5	-8.16058		80090.3	-8.38335					103480	-9.45588		95179.7	-8.97499		116421	-9.17726
70128.3	-11.084		82282.4	-8.08893		80092.5	-7.96966					103482	-9.53356		95199	-9.04257		116432	-9.3249
70137.8	-11.0543		82285.3	-8.33958		80094.7	-8.07458					103483	-9.4489		95218.4	-8.88628		116443	-9.30341
70147.3	-11.2359		82288.2	-8.20502		80096.9	-8.12913					103485	-9.50517		95237.8	-8.91563		116454	-9.45414
70156.8	-11.2418		82291.2	-8.29325		80099	-8.1853					103486	-9.53944		95257.2	-8.91908		116465	-9.44848
70166.3	-11.1033		82294.1	-8.08232		80103.3	-8.3945					103488	-9.44996		95276.6	-9.01122		116476	-9.43452
70175.9	-11.2036		82296.9	-8.00517		80107.4	-8.42076					103489	-9.54317		95296.1	-8.94257		116486	-9.41647
70185.5	-11.3615		82299.8	-8.12476		80109.4	-8.40086					103491	-9.47268		95315.6	-8.88542		116497	-9.4695
70195.2	-11.3176		82302.5	-8.14728		80111.4	-8.27675					103492	-9.5606		95335.1	-8.96015		116507	-9.30253
70204.9	-11.2683		82305.2	-8.06853		80113.5	-8.0409					103494	-9.4864		95354.6	-8.92335		116517	-9.24354
70214.6	-11.3171		82307.9	-7.99283		80115.5	-8.24338					103495	-9.47581		95374.3	-8.94798		116527	-9.20875
70224.3	-11.2648		82310.5	-8.20097		80117.6	-8.14188					103497	-9.53406		95394	-9.04064		116537	-9.4375
70234	-11.2319		82313.1	-8.23896		80119.8	-8.16155					103498	-9.4219		95413.9	-8.8839		116547	-9.38337
70243.7	-11.2128		82315.7	-8.04613		80122	-8.07119					103500	-9.3949		95433.8	-8.89111		116557	-9.21657
70253.3	-11.1507		82318.3	-8.0682		80124.2	-8.36215					103501	-9.39931		95454	-8.9301		116567	-9.03447
70262.9	-11.1594		82320.9	-7.8287		80126.6	-8.13834					103503	-9.38978		95474.3	-8.9614		116577	-9.00435
70272.5	-11.1242		82323.6	-8.0058		80129	-8.25327					103505	-9.35556		95494.9	-8.96459		116587	-9.26592
70282	-11.1719		82326.2	-7.95803		80131.5	-8.31353					103507	-9.43855		95515.6	-8.99948		116597	-9.28018
70291.4	-11.1266		82329	-7.95169		80134	-8.14645					103508	-9.48342		95536.4	-8.88024		116606	-9.54175
70300.7	-11.0115		82331.7	-8.02117		80136.7	-8.15051					103510	-9.59426		95557.4	-8.93594		116616	-9.54889
70309.9	-11.0677		82334.5	-8.08429		80139.3	-8.15953					103512	-9.67362		95578.5	-8.91118		116626	-9.39442
70319.1	-11.0865		82337.3	-8.16261		80142.1	-8.20103					103514	-9.77372		95599.6	-8.85072		116636	-9.44277
70328.1	-10.9931		82340.2	-8.13721		80144.8	-8.30226					103516	-9.6521		95620.8	-8.88856		116645	-9.38199
70337	-10.9602		82343	-8.20552		80147.6	-8.45441					103517	-9.70854		95641.9	-9.00304		116655	-9.47073
70345.8	-10.9406		82345.8	-7.98816		80150.4	-8.19434					103519	-9.77831		95663.1	-8.87839		116665	-9.60396
70354.5	-10.9287		82348.7	-8.09447		80153.3	-8.09952					103521	-9.70398		95684.2	-8.83302		116674	-9.46355
70363	-10.7677		82351.5	-8.13866		80156.2	-8.35624					103523	-9.70141		95705.2	-8.81424		116684	-9.56208
70371.4	-10.8931		82354.2	-8.2224		80159.1	-8.43609					103525	-9.79111		95726.2	-8.8936		116694	-9.48783
70379.7	-10.9738		82356.9	-8.22093		80161.9	-8.31457					103527	-9.7841		95747.1	-8.90577		116704	-9.53103
70387.8	-10.9138		82359.6	-8.34102		80164.8	-8.30462					103529	-9.86341		95767.8	-8.90137		116713	-9.62792
70395.8	-10.7497		82362.2	-8.12583		80167.7	-8.15221					103531	-9.67762		95788.5	-8.75901		116723	-9.44989
70403.6	-10.9578		82364.9	-8.20532		80170.6	-8.25279					103533	-9.82217		95809.1	-8.83537		116733	-9.37345
70411.2	-10.8432		82367.5	-8.01311		80173.4	-8.07506					103535	-9.72579		95829.6	-8.96073		116743	-9.48455
70418.7	-10.848		82370	-8.32978		80176.2	-8.10629					103537	-9.68643		95849.9	-8.91042		116753	-9.4821
70426.1	-10.7626		82372.6	-8.23876		80178.9	-7.91398					103539	-9.85394		95870.1	-8.90925		116763	-9.51052
70433.3	-10.794		82375.1	-8.19627		80181.6	-8.01757					103541	-9.73594		95890.3	-8.83496		116773	-9.30622
70440.3	-10.8105		82377.6	-8.38883		80184.3	-8.20421					103544	-9.72918		95910.4	-8.9355		116783	-9.33164
70447.3	-10.8665		82380.2	-8.27155		80187	-8.09529					103546	-9.71531		95930.5	-8.91683		116793	-9.36343
70454.1	-10.5571		82382.7	-8.21211		80189.6	-8.05004					103548	-9.74218		95950.5	-8.9399		116804	-9.326
70460.8	-10.5189		82385.2	-8.09013		80192.3	-8.00713					103550	-9.79205		95970.6	-8.90267		116814	-9.17685
70467.4	-10.676		82387.7	-8.07449		80194.9	-8.19168					103552	-9.68748		95990.6	-8.93574		116825	-9.40698
70473.9	-10.4974		82390.2	-7.96721		80197.6	-8.0768					103554	-9.72418		96010.7	-8.88705		116835	-9.29129
70480.4	-10.3686		82392.7	-8.02193		80200.3	-8.48768					103556	-9.68179		96030.7	-8.95971		116846	-9.20529
70486.7	-10.439		82395.2	-8.03912		80203.1	-7.74328					103558	-9.74287		96050.6	-8.89635		116857	-9.2942
70493.1	-10.5027		82397.7	-8.19442		80205.9	-7.73847					103560	-9.76443		96070.5	-8.85987		116868	-9.25865
70499.3	-10.3173		82400.1	-8.22513		80208.9	-7.86366					103562	-9.78508		96090.2	-9.00065		116879	-9.08346
70505.5	-10.2557		82402.6	-8.23663		80211.9	-7.79787					103564	-9.77159		96109.8	-8.97781		116890	-9.11218
70511.7	-10.4403		82405	-8.28634		80214.9	-7.67352					103567	-9.81561		96129.2	-8.89833		116901	-9.21164
70517.9	-10.4559		82407.4	-8.23636		80218.1	-7.88006					103569	-9.83173		96148.3	-8.80701		116912	-9.11818
70524	-10.4221		82409.8	-8.28046		80221.2	-7.83382					103571	-9.72956		96167.3	-9.01111		116923	-9.12686
70530.1	-10.3872		82412.1	-8.35174		80224.5	-7.78493					103573	-9.98535		96186	-8.91609		116934	-9.10757
70536.2	-10.2962		82414.5	-8.32319		80227.8	-7.73658					103575	-9.83699		96204.5	-9.06317		116945	-9.07865
70542.3	-10.3156		82416.8	-8.25127		80231.1	-7.70746					103577	-9.87632		96222.7	-8.90954		116955	-9.07591
70548.4	-10.479		82419.2	-8.26736		80234.5	-7.62744					103579	-9.81761		96240.6	-8.86511		116966	-9.05963
70554.4	-10.3732		82421.5	-8.40323		80238	-7.80451					103580	-9.88793		96258.3	-8.90375		116976	-9.22393
70560.5	-10.2468		82423.9	-8.11707		80241.4	-7.91157					103582	-9.96685		96275.6	-8.85865		116986	-9.25366
70566.6	-10.2514		82426.3	-8.1611		80245	-7.78481					103584	-9.97718		96292.5	-8.97596		116996	-9.16808
70572.8	-10.1285		82428.7	-8.115		80248.5	-7.89027					103586	-10.0164		96309.1	-9.05753		117006	-9.24347
70578.9	-10.1145		82431.2	-8.26632		80252.1	-7.85718					103588	-9.94916		96325.2	-9.11727		117016	-9.21884
70585.1	-10.1231		82433.6	-8.38755		80255.8	-7.83997					103590	-10.0738		96340.8	-8.98219		117026	-9.20245
70591.3	-10.3358		82436.1	-8.23533		80259.5	-7.91709					103592	-10.1309		96355.8	-9.04213		117035	-9.26699
70597.6	-10.3639		82438.6	-8.07877		80263.2	-7.91309					103594	-10.0715		96370.1	-9.01316		117045	-9.38432
70603.8	-10.2679		82441.2	-8.04637		80267.1	-7.75499					103595	-10.135		96383.8	-9.19455		117054	-9.17228
70610.1	-10.3479		82443.8	-7.85998		80271	-7.85852					103597	-9.97786		96396.7	-9.18331		117064	-9.2059
70616.3	-10.2855		82446.4	-8.05563		80274.9	-7.76288					103599	-10.0564		96408.8	-9.20292		117073	-9.34388
70622.6	-10.2529		82449	-8.19569		80279	-7.92856					103601	-10.0317		96420.1	-8.87097		117082	-9.40349
70628.8	-10.301		82451.7	-8.19584		80283.1	-8.03193					103603	-9.98029		96430.8	-8.93773		117092	-9.52235
70635	-10.3289		82454.4	-8.08164		80287.3	-8.06374					103605	-9.99023		96440.9	-8.92321		117101	-9.62112
70641.2	-10.3268		82457.2	-8.23114		80291.6	-8.17444					103607	-10.0038		96450.4	-8.83364		117110	-9.43863
70647.3	-10.2454		82459.9	-8.16819		80296	-7.86169					103608	-10.0504		96459.6	-8.88148		117119	-9.50474
70653.4	-10.0265		82462.7	-8.06004		80300.5	-7.92726					103610	-10.0394		96468.3	-8.91402		117129	-9.5572
70659.5	-10.1418		82465.5	-8.13519		80305.2	-7.89686					103612	-10.1368		96476.8	-8.96375		117138	-9.63671
70665.5	-9.9408		82468.3	-8.12917		80309.9	-7.90599					103614	-10.2339		96485.1	-8.82381		117147	-9.75474
70671.4	-9.96127		82471.2	-8.1948		80314.9	-7.82636					103616	-10.3081		96493.4	-8.85588		117156	-9.57803
70677.3	-9.99709		82474	-8.16404		80320	-7.7756					103618	-10.3676		96502	-8.91469		117165	-9.59183
70683.1	-10.1606		82476.8	-8.15537		80325.2	-7.84189					103620	-10.2916		96511.1	-8.93138		117174	-9.5819
70688.9	-10.038		82479.6	-8.21158		80330.6	-7.93219					103622	-10.3702		96520.9	-8.93773		117183	-9.60687
70700.4	-9.77559		82482.4	-8.20507		80336.1	-7.81644					103624	-10.3792		96531.7	-8.95278		117191	-9.65571
70706.1	-9.72018		82485.2	-8.03392		80341.6	-7.74309					103625	-10.5219		96543.7	-8.92642		117200	-9.68466
70711.7	-9.73396		82487.9	-8.05446		80347.3	-7.73554					103627	-10.4784		96557.2	-8.83914		117208	-9.58025
70717.4	-9.67987		82490.7	-8.00507		80352.9	-7.88987					103629	-10.4458		96572.3	-8.87458		117216	-9.54039
70723	-9.84392		82493.4	-8.1534		80358.6	-7.69091					103631	-10.4545		96588.9	-8.87003		117224	-9.48751
70728.7	-9.69815		82496.1	-8.19388		80364.3	-7.72328					103633	-10.3594		96606.9	-8.85167		117231	-9.31627
70734.4	-9.60845		82498.8	-8.06704		80369.9	-7.78171					103635	-10.2571		96626.1	-8.83716		117239	-9.32602
70740	-9.66088		82501.5	-8.1249		80375.5	-7.66388					103637	-10.3914		96646.3	-8.89627		117246	-9.29409
70745.7	-9.64634		82504.3	-8.11813		80381	-7.63182					103639	-10.3669		96667.3	-8.91464		117253	-9.29105
70751.4	-9.69627		82507	-8.12229		80386.3	-7.64672					103641	-10.5219		96689.1	-8.89894		117260	-9.17187
70757.1	-9.6758		82509.8	-8.06688		80391.7	-7.89759					103643	-10.4421		96711.3	-9.03508		117267	-9.28213
70762.8	-9.58258		82512.5	-8.10125		80396.9	-8.00612					103645	-10.4879		96734	-8.89726		117274	-9.31478
70768.5	-9.50998		82515.3	-8.1052		80402.1	-7.91471					103646	-10.4167		96756.9	-8.81285		117281	-9.34623
70774.2	-9.46019		82518.1	-7.99067		80407.2	-7.74084					103648	-10.4315		96780.2	-8.77381		117288	-9.27322
70779.8	-9.41656		82520.9	-7.97247		80412.3	-7.89368					103650	-10.4099		96803.7	-8.90398		117294	-9.11218
70785.5	-9.35037		82523.7	-7.81812		80417.3	-7.81719					103652	-10.4422		96827.4	-8.77228		117301	-9.06639
70791.1	-9.35615		82526.6	-7.83274		80422.3	-7.869					103654	-10.4768		96851.3	-8.80918		117307	-9.14715
70796.6	-9.22672		82529.4	-7.76829		80427.3	-8.01175					103656	-10.4557		96875.3	-8.85084		117314	-9.292
70802.1	-9.14889		82532.3	-7.89922		80432.3	-7.9391					103658	-10.5219		96899.4	-8.85107		117320	-9.45622
70807.6	-9.36831		82535.1	-7.83352		80437.2	-7.92037					103660	-10.5674		96923.6	-8.80389		117327	-9.40502
70813	-9.19676		82538	-7.90068		80442.1	-7.89539					103661	-10.6237		96947.9	-8.86379		117333	-9.38418
70818.4	-9.20276		82540.8	-7.79281		80447	-7.90803					103663	-10.5971		96972.3	-8.79951		117340	-9.43031
70823.7	-9.15415		82543.7	-7.78078		80451.8	-7.8372					103665	-10.5283		96996.9	-8.82439		117347	-9.4894
70829	-9.07857		82546.5	-7.8164		80456.6	-8.34584					103667	-10.6351		97021.7	-8.75762		117354	-9.38718
70834.2	-9.13128		82549.3	-7.887		80461.4	-8.43601					103669	-10.6416		97046.7	-8.70356		117360	-9.55431
70839.4	-8.95756		82552.2	-7.87485		80466	-8.29568					103670	-10.6517		97072.1	-8.80476		117367	-9.50785
70844.7	-9.02083		82555	-7.9812		80470.7	-8.20207					103672	-10.6178		97097.8	-8.78322		117374	-9.38453
70849.9	-9.01352		82557.8	-7.97817		80475.2	-8.37023					103674	-10.6107		97123.8	-8.75905		117381	-9.44064
70855.2	-9.16099		82560.6	-7.95243		80479.7	-8.24156					103676	-10.648		97150.2	-8.67404		117389	-9.49844
70860.5	-9.19795		82563.4	-8.21318		80484.2	-8.30973					103677	-10.628		97176.9	-8.67396		117396	-9.4709
70865.9	-9.07938		82566.1	-7.93055		80488.5	-8.17352					103679	-10.6368		97203.8	-8.70973		117404	-9.55678
70871.4	-9.13289		82568.9	-7.95509		80492.8	-8.11409					103681	-10.6289		97230.9	-8.84213		117412	-9.6164
70876.9	-9.21111		82571.6	-8.00628		80496.9	-8.15212					103682	-10.5974		97258.2	-8.71388		117419	-9.45814
70882.6	-9.23877		82574.3	-8.07975		80500.9	-8.08074					103684	-10.5949		97285.6	-8.69836		117427	-9.47303
70888.4	-9.25079		82577	-7.81056		80504.8	-7.98138					103686	-10.6127		97313	-8.69863		117436	-9.46058
70894.3	-9.30061		82579.7	-7.74648		80508.6	-7.92616					103687	-10.5728		97340.5	-8.66639		117444	-9.45362
70900.3	-9.28451		82582.4	-7.78165		80512.2	-7.74032					103689	-10.4711		97368	-8.66059		117452	-9.5329
70906.4	-9.22704		82585.1	-7.76681		80515.7	-8.007					103690	-10.5795		97395.4	-8.69413		117460	-9.60763
70912.6	-9.15929		82587.8	-7.85314		80519	-8.07161					103692	-10.5947		97422.8	-8.73375		117469	-9.61187
70918.9	-9.06247		82590.5	-8.03225		80522.2	-7.98999					103694	-10.6488		97450.2	-8.72658		117477	-9.23582
70925.3	-9.1051		82593.3	-8.05151		80525.3	-7.94674					103695	-10.5733		97477.5	-8.66411		117485	-9.17777
70931.8	-8.97793		82596	-8.08386		80528.3	-7.96663					103697	-10.611		97504.7	-8.61876		117494	-9.05624
70938.4	-8.92933		82598.8	-7.89149		80531.3	-7.90472					103699	-10.5902		97531.8	-8.66558		117502	-9.13663
70945	-8.88584		82601.6	-8.00065		80534.3	-7.94125					103700	-10.6227		97558.8	-8.63867		117510	-9.0119
70951.7	-8.77088		82604.4	-8.24972		80537.3	-7.79092					103702	-10.6675		97585.7	-8.66315		117518	-9.25949
70958.4	-8.79837		82607.2	-7.9626		80540.4	-7.90504					103704	-10.7479		97612.5	-8.73513		117526	-9.35526
70965.2	-8.6942		82610	-7.86638		80543.5	-8.03499					103705	-10.5669		97639.3	-8.76369		117534	-9.30016
70972	-8.54449		82612.9	-8.09548		80546.8	-8.0775					103707	-10.6446		97666	-8.63406		117542	-9.51103
70978.9	-8.5499		82615.7	-8.19543		80550.2	-8.12247					103709	-10.6903		97692.8	-8.71773		117550	-9.48416
70985.8	-8.53522		82618.5	-8.23939		80553.7	-8.19463					103711	-10.6821		97719.7	-8.66929		117557	-9.35302
70992.7	-8.45536		82621.3	-8.24572		80557.4	-8.06825					103713	-10.7292		97746.6	-8.75599		117565	-9.35235
70999.6	-8.45538		82624	-8.28947		80561.1	-8.10415					103714	-10.7161		97773.6	-8.76882		117572	-9.37329
71006.6	-8.31342		82626.8	-8.43194		80564.9	-8.21099					103716	-10.6234		97800.7	-8.72194		117579	-9.13061
71013.6	-8.19858		82629.6	-8.28914		80568.7	-8.14231					103718	-10.779		97828	-8.72883		117587	-9.17854
71020.6	-8.08232		82632.3	-8.09601		80572.6	-8.38056					103720	-10.7439		97855.3	-8.78038		117594	-9.16762
71027.7	-8.21038		82635.1	-7.98869		80576.5	-8.18244					103722	-10.7423		97882.7	-8.70694		117601	-9.14182
71034.8	-8.16855		82637.8	-7.93403		80580.4	-8.30216					103723	-10.6429		97910.2	-8.82094		117608	-9.17558
71041.8	-8.04485		82640.6	-8.08732		80584.3	-8.11999					103725	-10.6964		97937.8	-8.81943		117615	-9.13911
71049	-7.98629		82643.4	-8.04202		80588.1	-8.18454					103727	-10.6708		97965.5	-8.75754		117621	-9.10727
71056.1	-8.00999		82646.2	-8.15631		80591.9	-7.8497					103729	-10.7478		97993.3	-8.75188		117628	-9.00999
71063.2	-7.7127		82649	-8.26546		80599.4	-7.9123					103731	-10.755		98021.3	-8.7467		117635	-8.92622
71070.4	-7.43105		82651.8	-8.41502		80603.2	-7.88253					103733	-10.8602		98049.5	-8.64181		117641	-8.99687
71077.5	-7.34344		82654.6	-8.4595		80607	-7.90072					103735	-10.8456		98078.1	-8.65219		117648	-9.04342
71084.7	-7.62733		82657.5	-8.46499		80610.7	-8.03084					103737	-10.6489		98107	-8.62734		117655	-9.07015
71092	-7.42566		82660.4	-8.19057		80614.6	-8.07015					103739	-10.7965		98136.4	-8.64027		117662	-9.20847
71099.2	-7.34357		82663.3	-8.30316		80618.4	-8.23887					103740	-10.7958		98166.3	-8.75979		117669	-9.16146
71106.5	-7.28426		82666.2	-8.26163		80622.3	-8.22591					103742	-10.7846		98196.9	-8.68788		117677	-9.10769
71113.9	-7.26308		82669	-8.17734		80626.3	-7.8987					103744	-10.8018		98228.1	-8.68348		117684	-9.12
71121.2	-7.21687		82671.9	-7.99007		80630.3	-7.82094					103746	-10.8123		98259.9	-8.68159		117692	-9.17172
71128.7	-7.22421		82674.8	-7.94458		80634.4	-7.95399					103748	-10.8599		98292.1	-8.66909		117700	-9.18807
71136.2	-7.09486		82677.7	-7.8942		80638.5	-7.98152					103750	-10.8522		98324.8	-8.73074		117708	-9.21193
71143.7	-7.04065		82680.6	-7.88399		80642.7	-8.02035					103752	-10.8628		98357.7	-8.80283		117717	-9.20609
71151.3	-7.08179		82683.4	-8.13213		80646.9	-8.02744					103754	-10.8685		98390.8	-8.6929		117726	-9.23872
71159	-7.14815		82686.3	-8.16073		80651.1	-8.06665					103756	-10.8477		98424	-8.78219		117736	-9.13623
71166.8	-7.1461		82689.1	-8.17986		80655.4	-7.93593					103758	-10.7864		98457.2	-9.03374		117745	-9.24061
71174.6	-7.25192		82691.9	-8.05934		80659.6	-8.0193					103760	-10.8087		98490.2	-8.80618		117755	-9.25268
71182.5	-7.31799		82694.8	-8.00019		80663.9	-7.96143					103763	-10.7994		98523.1	-8.87189		117765	-9.26968
71190.4	-7.1586		82697.6	-8.08312		80668.2	-7.95404					103765	-10.9152		98555.8	-8.78487		117775	-9.36038
71198.3	-7.22154		82700.5	-8.08459		80672.5	-7.70258					103767	-10.7084		98588.3	-8.78992		117785	-9.30807
71206.3	-7.24706		82703.3	-8.12318		80676.8	-7.93398					103769	-10.6864		98620.5	-8.71973		117795	-9.18338
71214.2	-7.07864		82706.2	-7.95576		80681.1	-7.86979					103771	-10.7184		98652.6	-8.60434		117805	-9.14057
71222.1	-7.01368		82709	-7.99138		80685.3	-7.8068					103773	-10.7089		98684.3	-8.5953		117815	-9.22884
71230	-7.01318		82711.9	-8.0709		80689.5	-7.85859					103775	-10.7329		98715.8	-8.6125		117825	-9.20321
71237.8	-7.09503		82714.8	-8.25952		80693.7	-7.82455					103777	-10.6704		98746.9	-8.60473		117835	-9.20042
71245.5	-7.09805		82717.7	-7.93546		80697.8	-7.90304					103779	-10.6766		98777.8	-8.64455		117844	-9.1576
71253.1	-7.26543		82720.6	-8.08817		80701.8	-8.04136					103781	-10.7289		98808.3	-8.58166		117853	-9.03328
71260.6	-7.18049		82723.5	-8.09685		80705.8	-7.88779					103784	-10.7091		98838.6	-8.6254		117862	-9.18936
71268	-7.17855		82726.4	-7.96354		80709.7	-7.88668					103786	-10.5882		98868.6	-8.64912		117872	-9.14541
71275.2	-7.22542		82729.4	-7.79782		80713.6	-8.01642					103788	-10.6859		98898.4	-8.63136		117882	-9.10872
71282.4	-7.25147		82732.3	-7.86213		80717.4	-8.06639					103790	-10.6904		98927.9	-8.5486		117892	-9.10281
71289.3	-7.33613		82735.2	-7.90069		80721.1	-8.04948					103792	-10.6759		98957.2	-8.42984		117903	-9.06914
71296.2	-7.30392		82738.1	-7.83003		80724.9	-8.14598					103794	-10.6882		98986.3	-8.38772		117914	-9.1559
71303	-7.18071		82741	-7.85298		80728.6	-7.97434					103796	-10.6651		99015.2	-8.26963		117927	-9.24918
71309.7	-7.0729		82743.9	-7.8837		80732.3	-7.91335					103799	-10.6421		99043.9	-8.31011		117941	-9.16662
71316.4	-7.15821		82746.8	-8.00162		80736	-7.88005					103801	-10.5387		99072.5	-8.27264		117956	-9.17253
71323	-7.23881		82749.7	-7.84105		80739.8	-7.82769					103803	-10.6144		99101	-8.37499		117973	-9.1125
71329.6	-7.18064		82752.6	-7.6651		80743.6	-7.77789					103805	-10.6678		99129.5	-8.28453		117991	-9.08106
71336.1	-7.20271		82755.5	-7.73683		80747.5	-7.77216					103807	-10.7195		99157.9	-8.36742		118011	-9.22478
71342.7	-7.05527		82758.4	-7.60779		80751.4	-7.82467					103809	-10.7397		99186.3	-8.29068		118033	-8.86415
71349.2	-6.96621		82761.3	-7.7659		80755.4	-7.71017					103812	-10.6728		99214.7	-8.21582		118056	-9.18749
71355.8	-7.15821		82764.2	-7.71976		80759.4	-7.64525					103814	-10.6177		99243.2	-8.15627		118081	-9.03811
71362.4	-7.14656		82767.1	-7.70377		80763.4	-7.80231					103816	-10.6269		99271.7	-8.22085		118106	-9.0878
71369.1	-7.11739		82769.9	-7.6502		80767.4	-7.76185					103818	-10.657		99300.3	-8.54742		118133	-8.96386
71375.7	-6.95678		82772.8	-7.92784		80771.4	-7.66785					103820	-10.6498		99328.9	-8.35365		118160	-9.0913
71382.5	-6.86829		82775.6	-7.83217		80775.3	-7.68881					103822	-10.544		99357.5	-8.30139		118213	-9.10314
71389.2	-6.99109		82778.5	-7.65937		80783.2	-7.78311					103824	-10.6495		99386.3	-8.30824		118240	-9.02605
71396	-7.04816		82781.3	-7.572		80787.1	-7.73524					103827	-10.4869		99415.1	-8.2578		118266	-8.98149
71402.8	-7.16297		82784.1	-7.69828		80791	-7.8886					103829	-10.5323		99444	-8.27113		118291	-8.86016
71409.6	-7.09702		82786.8	-7.84191		80794.8	-7.82724					103831	-10.4634		99473	-8.47848		118315	-8.76091
71416.4	-7.18559		82789.6	-7.71905		80798.6	-7.79501					103833	-10.4334		99502	-8.46556
71423.2	-7.12794		82792.3	-7.69996		80802.4	-7.88213					103835	-10.4955		99531.1	-8.33916
71430	-7.11147		82794.9	-7.54975		80806.2	-7.90029					103837	-10.4077		99560.4	-8.27576
71436.9	-7.14746		82797.6	-7.70366		80810.1	-8.08548					103840	-10.5174		99589.7	-8.4014
71443.7	-7.16726		82800.2	-7.66329		80813.9	-7.83385					103842	-10.5592		99619.1	-8.34086
71450.5	-7.21483		82802.9	-7.73598		80817.9	-7.76908					103844	-10.4882		99648.6	-8.33524
71457.4	-7.23156		82805.5	-7.81446		80821.8	-7.84106					103846	-10.4715		99678.2	-8.39647
71464.2	-7.20786		82808.1	-7.86559		80825.8	-7.80944					103848	-10.4518		99707.9	-8.29068
71471	-7.08547		82810.8	-7.89723		80829.9	-7.7372					103850	-10.4071		99737.7	-8.38556
71477.7	-7.05406		82813.4	-7.82129		80838.1	-7.70436					103853	-10.5221		99767.7	-8.34546
71484.5	-7.04698		82818.9	-7.8096		80842.3	-7.51818					103855	-10.4406		99797.8	-8.43699
71491.3	-7.07357		82821.7	-8.03984		80846.4	-7.75138					103857	-10.4406		99828.2	-8.30888
71498	-7.02712		82824.5	-8.14178		80850.6	-7.68045					103859	-10.4221		99858.8	-8.31448
71504.7	-7.05924		82827.3	-8.22673		80854.7	-7.60106					103861	-10.4569		99889.6	-8.42582
71511.4	-7.25577		82830.2	-7.94982		80858.8	-7.63687					103864	-10.4077		99920.7	-8.4379
71518.1	-7.22758		82833.1	-8.00045		80862.8	-7.67141					103866	-10.481		99952	-8.26046
71524.7	-7.23066		82836.1	-7.87687		80866.8	-7.67007					103868	-10.4801		99983.4	-8.19064
71531.4	-7.15132		82842	-7.70191		80870.8	-7.63935					103870	-10.498		100015	-8.23793
71537.9	-7.15377		82845	-8.05415		80874.7	-7.48335					103872	-10.4418		100047	-8.29555
71544.5	-7.28278		82848	-8.06131		80878.5	-7.56831					103875	-10.4262		100078	-8.06317
71551.1	-7.08146		82851	-8.14441		80882.3	-7.64862					103877	-10.4012		100110	-8.28416
71557.6	-6.967		82853.9	-8.09275		80886	-7.68673					103879	-10.4434		100141	-8.14377
71564.1	-7.03988		82856.9	-7.90696		80889.7	-7.74044					103881	-10.4042		100172	-8.14334
71570.5	-6.87494		82859.9	-8.0312		80893.4	-7.61674					103884	-10.3415		100203	-8.21832
71577	-6.90343		82862.9	-8.04234		80896.9	-7.57461					103886	-10.4079		100234	-8.38994
71583.4	-6.75994		82865.9	-7.91753								103888	-10.4292		100264	-8.32331
71589.8	-6.83816		82868.8	-7.68781								103890	-10.4143		100295	-8.26552
71596.2	-7.0081		82871.8	-7.83749								103892	-10.3948		100325	-8.31929
71602.5	-6.86932		82874.7	-7.9881								103895	-10.3921		100354	-8.26737
71608.9	-6.72553		82877.7	-7.88213								103897	-10.3581		100384	-8.32164
71615.2	-6.64588		82880.6	-7.92674								103899	-10.3292		100413	-8.36484
71621.5	-6.62733		82883.5	-7.86622								103901	-10.3234		100442	-8.24325
71627.8	-6.68863		82886.4	-7.93725								103903	-10.4248		100471	-8.31833
71634	-6.6438		82889.2	-7.84748								103905	-10.3326		100499	-8.30424
71640.3	-6.67167		82892.1	-7.8816								103907	-10.4916		100527	-8.27935
71646.5	-6.58272		82894.9	-7.80147								103909	-10.4259		100555	-8.21089
71652.7	-6.56555		82897.8	-7.85012								103911	-10.4676		100583	-8.2424
71658.8	-6.61235		82900.6	-7.87312								103913	-10.4306		100611	-8.03338
71664.9	-6.56649		82903.4	-8.22822								103915	-10.4057		100638	-8.08052
71670.9	-6.519		82908.9	-8.08861								103917	-10.4342		100666	-8.12603
71676.9	-6.53621		82911.7	-7.97977								103919	-10.4778		100693	-8.00559
71682.8	-6.58693		82914.4	-7.76405								103921	-10.4347		100720	-8.11567
71688.7	-6.55009		82917.2	-7.90291								103922	-10.2847		100747	-8.00519
71694.4	-6.79207		82919.9	-7.83982								103924	-10.4152		100774	-7.9763
71700.1	-7.05331		82922.6	-7.85683								103926	-10.3763		100801	-7.97203
71705.7	-6.86944		82925.3	-7.76097								103928	-10.3403		100828	-8.07795
71711.3	-6.82849		82928	-7.77225								103929	-10.3564		100855	-7.94296
71716.7	-7.02433		82930.7	-7.77863								103931	-10.3731		100882	-8.0764
71722.1	-6.94172		82933.4	-7.87493								103933	-10.2862		100908	-7.95523
71727.5	-7.11368		82936.1	-7.75352								103934	-10.3211		100935	-8.06628
71732.9	-7.17936		82938.8	-7.85088								103936	-10.2283		100962	-8.00018
71738.3	-7.46205		82941.6	-7.92286								103938	-10.2875		100988	-8.02213
71743.7	-7.46648		82944.5	-7.87061								103939	-10.2714		101015	-8.00912
71749.1	-7.51483		82947.4	-7.74663								103941	-10.3773		101042	-7.97858
71754.6	-7.58035		82950.5	-7.78032								103943	-10.367		101068	-7.95732
71760.2	-7.65638		82953.8	-7.64629								103944	-10.3697		101095	-8.01311
71765.9	-7.43997		82957.2	-7.71403								103946	-10.304		101121	-8.02975
71771.6	-7.28522		82960.8	-7.8596								103948	-10.3028		101148	-7.96839
71777.5	-7.3479		82964.6	-7.90491								103949	-10.2087		101174	-8.01677
71783.5	-7.50302		82968.7	-7.95049								103951	-10.2362		101201	-8.09872
71789.7	-7.51045		82973	-7.80052								103953	-10.3212		101227	-7.98075
71796	-7.54857		82977.4	-7.81611								103955	-10.2588		101254	-8.03498
71802.3	-7.70891		82981.9	-7.65084								103956	-10.3407		101281	-8.08255
71808.8	-7.63833		82986.5	-7.5695								103958	-10.3609		101307	-8.06359
71815.3	-7.67698		82991	-7.63729								103960	-10.2421		101334	-8.07405
71821.9	-7.63299		82995.5	-7.57663								103962	-10.2671		101360	-8.12682
71828.5	-7.67088		82999.8	-7.65056								103964	-10.1344		101387	-8.00591
71835.1	-7.64703		83004	-7.8751								103965	-10.2076		101413	-7.97851
71841.7	-7.5581		83008	-7.80392								103967	-10.2514		101440	-8.08417
71848.3	-7.53176		83011.7	-7.86022								103969	-10.0801		101466	-8.06192
71854.9	-7.49823		83015.1	-7.86406								103971	-10.1527		101493	-8.17515
71861.4	-7.66506		83018.3	-7.83864								103973	-10.162		101519	-8.13324
71867.9	-7.65806		83021.4	-7.90821								103975	-10.0962		101545	-8.10548
71874.4	-7.57324		83024.4	-7.73479								103977	-10.1381		101572	-8.15397
71880.7	-7.71635		83027.2	-7.60739								103979	-10.1137		101598	-8.06356
71887.1	-7.68058		83030	-7.68731								103981	-10.2035		101624	-8.04475
71893.4	-7.60446		83032.8	-7.84048								103983	-10.1119		101650	-8.13182
71899.6	-7.69692		83035.6	-7.97315								103986	-10.1765		101676	-8.07231
71905.9	-7.63683		83038.4	-7.81859								103988	-10.1775		101702	-8.09819
71912.1	-7.67681		83041.4	-7.98371								103990	-10.1131		101727	-8.13325
71918.4	-7.83993		83044.4	-7.97783								103992	-10.1341		101753	-7.99734
71924.6	-7.73738		83047.5	-7.92998								103994	-10.1662		101779	-8.07147
71930.8	-7.70776											103997	-10.2115		101805	-8.03559
71937.1	-7.64957		84679.9	-7.95823								103999	-10.2191		101830	-8.15785
71943.3	-7.59014		84689.3	-7.73456								104001	-10.2099		101856	-8.05291
71949.6	-7.64198		84698.9	-7.84684								104003	-10.1055		101881	-8.12426
71956	-7.47484		84708.5	-8.03541								104006	-10.0679		101906	-8.10139
71962.3	-7.63506		84718.2	-8.12072								104008	-10.1201		101932	-8.22418
71968.7	-7.5637		84727.9	-7.94274								104010	-10.0645		101957	-8.20895
71975.1	-7.69502		84737.5	-7.94166								104013	-10.1572		101983	-8.36941
71981.6	-7.5864		84747	-7.9898								104015	-10.0606		102008	-8.17119
71988	-7.80231		84756.4	-8.13978								104017	-10.1012		102034	-8.15033
71994.4	-7.82942		84765.6	-8.26986								104020	-10.2191		102060	-8.17489
72000.9	-7.83302		84774.6	-8.40186								104022	-10.0652		102086	-8.15596
72007.3	-7.96878		84783.4	-8.41193								104025	-10.0863		102112	-8.22994
72013.8	-7.96446		84791.9	-8.47434								104027	-10.1409		102138	-8.1957
			84800.2	-8.59221								104029	-10.0475		102165	-8.21293
			84808.4	-8.90255								104032	-10.0956		102192	-8.42471
			84816.5	-9.04533								104034	-10.1082		102218	-8.51266
			84824.5	-8.91851								104036	-10.1678		102245	-8.47457
			84832.5	-8.77591								104039	-10.0246		102272	-8.43323
			84840.4	-8.99596								104041	-10.1338		102299	-8.47226
			84848.5	-9.12905								104044	-10.0322		102326	-8.38585
			84856.6	-9.32344								104046	-10.0373		102353	-8.46065
			84864.9	-9.18499								104048	-10.1067		102379	-8.2377
			84873.3	-9.03659								104051	-10.1423		102406	-8.2448
			84881.8	-9.00434								104053	-10.1246		102432	-8.35187
			84890.4	-8.90238								104056	-10.1105		102458	-8.31468
			84899.1	-9.05258								104058	-10.1792		102484	-8.30315
			84907.8	-9.04243								104061	-10.1281		102510	-8.35741
			84916.6	-8.99562								104063	-10.142		102535	-8.34388
			84925.4	-9.26774								104066	-10.1786		102560	-8.41723
			84934.3	-9.42279								104068	-10.0813		102585	-8.39089
			84943.2	-9.41735								104071	-10.1524		102609	-8.44513
			84952.1	-9.14561								104073	-10.1552		102634	-8.4357
			84961	-9.13416								104076	-10.1481		102659	-8.39637
			84969.9	-9.3578								104078	-10.2843		102683	-8.35065
			84978.7	-8.88837								104081	-10.2461		102708	-8.32058
			84987.6	-8.46933								104083	-10.2745		102733	-8.32977
			84996.5	-8.54073								104085	-10.322		102758	-8.2995
			85005.3	-8.51872								104088	-10.3302		102783	-8.39027
			85014.1	-8.71443								104090	-10.3792		102809	-8.37921
			85022.9	-9.18796								104093	-10.3868		102834	-8.279
			85031.7	-10.011								104095	-10.3686		102860	-8.27802
			85040.4	-10.1374								104097	-10.4572		102886	-8.22931
			85049	-10.4881								104100	-10.4565		102912	-8.38287
			85057.6	-10.8141								104102	-10.473		102938	-8.27599
			85066	-10.8415								104104	-10.498		102964	-8.40171
			85074.3	-10.8156								104107	-10.5268		102991	-8.80299
			85082.3	-10.943								104109	-10.6		103017	-8.90622
			85090.1	-10.9348								104111	-10.4704		103043	-8.92827
			85097.7	-10.8958								104113	-10.5233		103069	-8.91108
			85104.9	-11.0883								104115	-10.6453		103096	-8.78604
			85111.8	-11.1365								104117	-10.5812		103122	-8.76167
			85118.4	-11.0494								104120	-10.6166		103147	-8.97627
			85124.7	-11.1103								104122	-10.6631		103173	-9.15557
			85130.7	-11.0556								104124	-10.6817		103199	-9.24899
			85136.5	-11.1969								104126	-10.805		103224	-9.43619
			85142.2	-10.924								104128	-10.8405		103249	-8.85286
			85147.8	-10.9712								104130	-11.0163		103274	-8.75156
			85153.5	-10.9449								104132	-11.1132		103300	-8.80357
			85159.2	-10.8675								104134	-11.0407		103324	-8.95831
			85165.1	-11.0793								104136	-11.0633		103349	-8.99988
			85171.1	-11.2532								104138	-11.0591		103374	-9.17625
			85177.4	-11.165								104140	-11.113		103399	-9.23553
			85183.9	-11.3262								104142	-11.0645		103424	-9.43203
			85190.6	-11.3535								104144	-11.2008		103448	-9.30488
			85197.5	-11.3415								104146	-11.1163		103473	-9.34206
			85204.6	-11.3993								104148	-11.1394		103497	-9.5565
			85211.8	-11.4836								104150	-11.1305		103522	-9.77836
			85219.1	-11.3105								104152	-11.4172		103546	-9.71482
			85226.5	-11.6052								104154	-11.2577		103571	-9.8621
			85234	-11.6949								104156	-11.3388		103595	-9.78485
			85241.5	-11.4729								104158	-11.2387		103620	-9.93417
			85249	-11.495								104160	-11.2554		103644	-10.0908
			85256.5	-11.3513								104162	-11.3811		103668	-10.5145
			85264	-11.2029								104165	-11.4385		103693	-10.3622
			85271.5	-11.1393								104167	-11.3906		103717	-10.55
			85278.8	-10.9802								104169	-11.3774		103741	-10.4106
			85286.1	-10.7553								104171	-11.3609		103764	-10.4661
			85293.3	-10.5267								104174	-11.3625		103788	-10.5364
			85300.3	-10.2222								104176	-11.1972		103812	-10.5115
			85307.2	-10.3315								104179	-11.3006		103836	-10.5878
			85313.9	-10.1653								104181	-11.4285		103859	-10.4306
			85320.4	-9.92932								104184	-11.3375		103882	-10.3925
			85326.7	-10.2232								104186	-11.2453		103906	-10.3225
			85333	-10.1634								104189	-11.3655		103929	-10.2763
			85339.1	-10.2454								104191	-11.5249		103953	-10.1573
			85345.2	-9.78564								104194	-11.4679		103976	-10.0757
			85351.4	-9.87753								104197	-11.4163		103999	-10.3465
			85357.5	-9.51732								104199	-11.507		104022	-10.3083
			85363.8	-9.52991								104202	-11.4576		104046	-10.1235
			85370.2	-9.68019								104205	-11.493		104069	-10.0599
			85376.7	-10.1066								104207	-11.5551		104093	-10.2438
			85383.5	-10.7214								104210	-11.5724		104117	-10.4069
			85390.4	-10.5456								104213	-11.5108		104140	-10.6547
			85397.6	-10.6855								104215	-11.6638		104164	-11.2838
			85405.1	-10.6045								104218	-11.665		104188	-11.1594
			85412.7	-10.7028								104221	-11.5838		104212	-11.3378
			85420.7	-10.8935								104224	-11.6446		104236	-11.4925
			85428.9	-10.9932								104226	-11.7259		104259	-11.6245
			85437.3	-11.2445								104229	-11.5923		104283	-11.5831
			85446.1	-10.9704								104232	-11.7559		104307	-11.5084
			85455.1	-11.0248								104235	-11.5734		104330	-11.6307
			85464.5	-10.7685								104238	-11.7096		104354	-11.4855
			85474.1	-10.6791								104240	-11.631		104377	-11.566
			85484	-10.8154								104243	-11.6594		104400	-11.5064
			85494.1	-10.8847								104246	-11.5914		104423	-11.5651
			85504.3	-10.8482								104249	-11.6197		104446	-11.683
			85514.8	-10.6728								104252	-11.7299		104470	-11.682
			85525.4	-10.6005								104255	-11.6979		104493	-11.8759
			85536.1	-10.6213								104257	-11.8949		104516	-11.8328
			85546.9	-10.6542								104260	-11.5411		104539	-11.6343
			85557.8	-10.7185								104263	-11.7267		104562	-11.795
			85568.7	-10.7829								104266	-11.5682		104585	-11.8162
			85579.7	-10.764								104269	-11.7421		104608	-11.7262
			85590.7	-10.7724								104272	-11.5922		104632	-11.6965
			85601.8	-10.6661								104275	-11.6854		104655	-11.6183
			85613	-10.9866								104278	-11.4218		104678	-11.5209
			85624.2	-11.1917								104281	-11.5223		104702	-11.5367
			85635.6	-11.043								104284	-11.5483		104725	-11.6714
			85647	-11.0954								104286	-11.5573		104749	-11.3654
			85658.6	-10.7824								104289	-11.4936		104818	-11.162
			85670.3	-10.7893								104292	-11.5761		104841	-11.1351
			85682.1	-10.6444								104295	-11.5505		104863	-11.1767
			85694.1	-10.8302								104298	-11.6043		104885	-11.1868
			85706.1	-11.0397								104301	-11.7054		104907	-11.3134
			85718.3	-11.1881								104304	-11.6764		104928	-11.1089
			85730.6	-11.1795								104307	-11.5587		104950	-11.0962
			85742.9	-11.1352								104310	-11.5304		104971	-11.1696
			85755.3	-10.9506								104313	-11.5359		104992	-10.888
			85767.8	-11.1885								104316	-11.5178		105013	-10.7959
			85780.3	-11.2124								104319	-11.5888		105035	-10.5845
			85792.8	-11.2746								104322	-11.6081		105056	-10.5942
			85805.3	-11.3								104324	-11.6233		105078	-10.5985
			85817.8	-11.2778								104327	-11.5997		105099	-10.6445
			85830.3	-11.2944								104330	-11.6606		105121	-10.3633
			85842.8	-11.1634								104333	-11.6762		105142	-10.4302
			85855.3	-11.5085								104336	-11.5082		105163	-10.3513
			85867.7	-11.4546								104338	-11.6326		105184	-10.3113
			85880	-11.6893								104341	-11.67		105205	-9.90719
			85892.2	-11.5206								104344	-11.6121		105245	-9.62135
			85904.3	-11.2523								104346	-11.7942		105286	-9.39906
			85916.3	-11.0133								104349	-11.7345		105307	-9.11962
			85928.2	-10.9895								104351	-11.8093		105328	-9.09705
			85940	-10.825								104354	-12.0144		105349	-8.90545
			85951.7	-10.9256								104356	-12.0165		105370	-9.00831
			85974.9	-11.265								104359	-11.9794		105392	-8.8902
			85986.5	-11.2649								104361	-11.8598		105414	-8.97115
			85998.1	-11.2417								104363	-11.8167		105437	-8.84608
			86009.7	-11.5246								104365	-11.5692		105459	-9.0202
			86021.4	-11.3911								104368	-11.7345		105481	-8.87943
			86033.2	-11.1754								104370	-11.6594		105504	-8.78946
			86045	-11.0647								104372	-11.7273		105527	-9.01112
			86056.9	-11.0383								104374	-11.7912		105549	-8.79989
			86069	-11.1197								104376	-11.9391		105571	-8.79839
			86081	-11.0131								104378	-11.7291		105594	-8.70663
			86093.2	-11.1309								104381	-11.6061		105616	-8.62157
			86105.4	-11.3112								104383	-11.6469		105639	-8.56159
			86117.7	-11.5201								104385	-11.6614		105661	-8.62431
			86130	-11.2585								104387	-11.7999		105683	-8.56816
			86142.4	-11.1412								104390	-11.8601		105706	-8.73988
			86154.8	-11.0469								104392	-11.8588		105728	-8.55372
			86167.2	-11.1276								104395	-11.8442		105751	-8.60413
			86179.6	-11.2959								104397	-11.8784		105774	-8.60285
			86192.1	-11.386								104400	-11.6905		105796	-8.6942
			86204.7	-11.6236								104402	-11.705		105819	-8.48004
			86217.3	-11.6827								104405	-11.564		105841	-8.54037
			86230	-11.5399								104408	-11.606		105864	-8.60065
			86242.7	-11.5203								104411	-11.5517		105887	-8.52977
			86255.6	-11.5294								104413	-11.5937		105909	-8.50952
			86268.6	-11.725								104416	-11.6314		105932	-8.53867
			86281.7	-11.881								104419	-11.517		105954	-8.58008
			86294.9	-11.6731								104422	-11.5129		105977	-8.45216
			86308.3	-11.9131								104425	-11.3123		105999	-8.67392
			86321.7	-11.9077								104428	-11.3707		106022	-8.54881
			86335.2	-11.9568								104431	-11.445		106044	-8.63499
			86362.4	-11.8172								104434	-11.3771		106067	-8.76073
			86376	-11.8152								104438	-11.4256		106089	-8.57365
			86389.6	-11.7254								104441	-11.3856		106112	-8.61774
			86416.9	-11.6417								104444	-11.4047		106135	-8.6021
			86430.5	-11.5352								104447	-11.4513		106157	-8.58573
			86444.1	-11.511								104451	-11.3879		106180	-8.7159
			86457.6	-11.4022								104454	-11.4145		106202	-8.88786
			86471.3	-11.682								104458	-11.2771		106225	-8.71682
			86484.9	-11.4605								104461	-11.4068		106248	-8.72486
			86498.7	-11.4896								104465	-11.4272		106270	-8.86209
			86512.5	-11.4229								104468	-11.3395		106293	-8.74157
			86526.5	-11.3474								104472	-11.4584		106316	-8.77396
			86540.6	-11.5716								104475	-11.4938		106339	-8.81988
			86569.4	-11.5949								104479	-11.5797		106361	-8.90624
			86599	-11.6536								104482	-11.5274		106384	-8.85234
			86614.1	-11.7187								104486	-11.5472		106407	-8.85221
			86629.3	-11.719								104489	-11.6284		106430	-8.7848
			86644.7	-11.6077								104493	-11.5545		106453	-8.92286
			86660.3	-11.4235								104497	-11.6312		106475	-8.93402
			86676.1	-11.3616								104500	-11.6635		106498	-9.01521
			86692	-11.4891								104504	-11.8115		106521	-8.86981
			86708.1	-11.5062								104507	-11.702		106544	-8.95611
			86724.4	-11.4045								104511	-11.6962		106567	-8.94848
			86741	-11.6167								104514	-11.6131		106589	-9.03006
			86758	-11.6379								104518	-11.6845		106612	-9.0768
			86775.5	-11.6418								104521	-11.6658		106635	-9.014
			86793.7	-11.7537								104525	-11.704		106658	-8.94242
			86812.7	-11.3306								104528	-11.6774		106681	-8.83144
			86832.7	-11.1304								104531	-11.7589		106704	-8.79359
			86853.7	-11.7667								104535	-11.7193		106727	-8.68826
			86875.9	-11.7776								104538	-11.6526		106750	-8.79927
			86899.5	-11.5095								104541	-11.7489		106773	-8.59574
			86924.4	-11.28								104545	-11.7509		106796	-8.51933
			86950.6	-11.334								104548	-11.6656		106819	-8.41939
			86977.9	-11.1362								104552			106842	-8.39865
			87006.1	-10.8673								104555	-11.7096		106865	-8.41188
			87034.9	-11.0195								104558	-11.7261		106888	-8.47622
			87064.2	-10.8534								104562	-11.8087		106911	-8.48803
			87093.8	-11.053								104565	-11.7493		106933	-8.45811
			87123.5	-11.0459								104569	-11.698		106956	-8.40752
			87153	-10.7779								104572	-11.7006		106979	-8.49607
			87182.3	-10.7381								104576	-11.7204		107001	-8.47106
			87211.1	-10.7883								104579	-11.6392		107023	-8.62766
			87239.4	-10.7698								104583	-11.5361		107045	-8.42737
			87267.4	-10.6441								104586	-11.4711		107067	-8.4072
			87295	-10.6704								104590	-11.4782		107089	-8.43682
			87322.3	-10.6184								104594	-11.4574		107112	-8.47513
			87349.4	-10.4845								104598	-11.3093		107134	-8.6244
			87376.4	-10.5152								104602	-11.1113		107156	-8.92698
			87403.2	-10.7791								104606	-11.1959		107179	-8.87092
			87430.1	-10.9427								104610	-11.2148		107201	-8.7682
			87456.9	-10.8327								104614	-11.3157		107224	-9.05574
			87483.7	-10.6134								104618	-11.2593		107247	-9.18797
			87510.6	-10.6955								104622	-11.224
			87537.3	-10.6242								104627	-11.1761
			87563.9	-10.7956								104631	-11.3044
			87590.2	-10.9233								104636	-11.2378
			87616.2	-11.075								104640	-11.2429
			87641.7	-10.9202								104645	-11.2347
			87666.7	-11.0154								104649	-11.1415
			87691	-11.1265								104654	-11.23
			87714.7	-11.2189								104659	-11.1623
			87737.7	-11.6293								104663	-11.1402
			87759.9	-11.8717								104668	-11.1598
			87781.4	-11.8228								104672	-11.1541
			87802.3	-11.4985								104677	-11.1629
			87822.6	-11.143								104682	-11.1547
			87842.3	-11.2597								104686	-11.1509
			87861.6	-11.4216								104691	-11.2011
			87880.3	-11.4972								104696	-11.1922
			87898.7	-11.2496								104701	-11.1511
			87916.7	-10.8995								104705	-11.1348
			87934.3	-10.8648								104710	-11.1676
			87951.7	-10.9314								104715	-11.1453
			87968.9	-10.83								104720	-11.0543
			87985.9	-10.6299								104725	-11.0607
			88002.7	-10.6073								104730	-10.9741
			88019.6	-10.8909								104735	-11.0654
			88036.4	-10.9213								104741	-11.1792
			88053.3	-10.8899								104746	-11.1531
			88070.3	-10.6909								104751	-11.1829
			88087.4	-10.6542								104756	-11.2106
			88104.7	-10.7546								104762	-11.2515
			88122.2	-10.69								104767	-11.1654
			88139.7	-10.7188								104773	-11.2128
			88157.1	-10.7503								104778	-11.1644
			88174.3	-10.7478								104784	-11.1814
			88191.3	-10.7373								104789	-11.0927
			88207.9	-10.7444								104795	-11.1466
			88224.1	-10.9617								104800	-11.1434
			88239.7	-11.0958								104806	-11.0883
			88254.7	-10.9892								104811	-11.0078
			88282.7	-11.0835								104817	-11.0441
			88295.6	-11.0876								104822	-11.0909
			88308.1	-11.1354								104828	-10.9964
			88320	-11.294								104833	-11.0321
			88331.4	-11.133								104839	-11.0344
			88342.4	-11.2107								104844	-11.0408
			88363.4	-11.1792								104849	-11.0057
			88373.5	-11.1432								104855	-11.0932
			88383.4	-11.2832								104860	-11.0548
			88393	-11.161								104865	-11.14
			88402.4	-11.145								104871	-10.9184
			88411.4	-11.0218								104876	-10.9343
			88420.1	-11.2217								104881	-10.9915
			88444	-11.2227								104886	-11.078
			88451.1	-11.0082								104891	-11.0436
			88457.6	-10.8607								104896	-10.9332
			88463.7	-10.8036								104900	-10.9998
			88469.3	-11.1054								104905	-10.9587
			88474.6	-11.1573								104910	-11.0387
			88479.6	-11.1064								104915	-11.0394
			88484.4	-10.9113								104920	-10.942
			88489.1	-10.8837								104924	-10.9137
			88493.7	-10.7019								104929	-10.9349
			88498.5	-10.5659								104934	-10.9321
			88503.4	-10.8281								104939	-10.9013
			88508.6	-10.9707								104943	-10.774
			88514	-11.0421								104948	-10.9406
			88519.7	-11.1221								104953	-10.7551
			88525.7	-11.1304								104958	-10.7142
			88538	-11.0469								104962	-10.7687
			88544.3	-10.8799								104967	-10.8672
			88550.5	-10.9131								104972	-10.8543
			88556.7	-10.8238								104976	-10.7766
			88562.8	-11.2145								104981	-10.7669
			88568.7	-10.9343								104986	-10.7635
			88574.5	-11.1317								104991	-10.7514
			88580	-11.0632								104995	-10.7444
			88585.4	-10.8437								105000	-10.8069
			88590.6	-10.7999								105005	-10.8126
			88595.8	-10.7406								105009	-10.8609
			88600.9	-10.7623								105014	-10.7068
			88605.9	-10.908								105019	-10.787
			88610	-11.02								105024	-10.8483
			88624.5	-10.78								105028	-10.6986
			88637.8	-10.73								105033	-10.659
			88651.2	-10.37								105038	-10.5907
			88665.7	-9.9								105043	-10.623
			88679	-10.03								105047	-10.6289
			88686.1	-9.82								105052	-10.676
			88693.2	-9.6								105057	-10.565
			88700.3	-9.18								105062	-10.619
			88707.4	-9.05								105067	-10.6203
			88715.1	-8.77								105072	-10.7033
			88722.2	-8.43								105078	-10.6771
			88729.3	-8.51								105083	-10.7295
			88736.4	-8.72								105088	-10.5242
			88744.2	-8.64								105094	-10.563
			88751.3	-8.91								105099	-10.6088
			88766.8	-8.7								105104	-10.597
			88773.9	-8.76								105110	-10.6118
			88781.6	-8.9								105115	-10.5949
			88789.3	-8.87								105121	-10.4872
			88797.7	-9.01								105126	-10.5032
			88805.5	-8.87								105132	-10.4735
			88813.9	-8.56								105138	-10.5189
			88821.6	-8.86								105143	-10.4785
			88830	-8.66								105149	-10.5299
			88839	-8.72								105154	-10.4607
			88847.4	-8.42								105160	-10.3778
			88856.4	-8.26								105165	-10.4739
			88865.5	-8.36								105171	-10.5436
			88874.5	-8.44								105176	-10.4844
			88883.5	-8.38								105182	-10.4713
			88893.2	-8.74								105187	-10.4516
			88902.3	-8.75								105193	-10.4125
			88911.3	-8.68								105198	-10.3157
			88919.7	-8.7								105203	-10.3082
			88928.1	-8.71								105208	-10.2851
			88935.8	-9.03								105214	-10.3703
			88943.5	-9.74								105219	-10.3359
			88950	-10								105224	-10.2986
			88979.5	-9.78								105228	-10.3461
			89005.6	-9.42								105233	-10.3571
			89031.8	-9.17								105238	-10.4104
			89051.5	-8.98								105243	-10.3316
			89074.4	-8.44								105247	-10.3129
			89094	-8.39								105252	-10.3683
			89099.8	-8.48								105257	-10.3684
			89105.7	-8.51								105261	-10.3129
			89112.5	-8.68								105266	-10.2502
			89119.3	-8.51								105271	-10.2956
			89126.2	-8.43								105275	-10.1381
			89134.9	-8.37								105280	-10.213
			89142.7	-8.18								105284	-10.1316
			89152.5	-8.16								105289	-10.2306
			89161.3	-8.16								105293	-10.0706
			89171	-8.01								105298	-10.1499
			89179.5	-8.13								105302	-10.1373
			89188	-8.05								105307	-10.2064
			89195.6	-8.35								105311	-10.1404
			89204.1	-8.28								105316	-10.0866
			89211.7	-8.17								105320	-10.0489
			89219.3	-8.2								105325	-9.98281
			89227	-8.27								105329	-10.0307
			89233.8	-8.27								105334	-10.114
			89241.4	-8.22								105338	-10.0851
			89247.3	-8.24								105343	-10.0116
			89254.1	-8.5								105347	-10.0279
			89260	-8.53								105351	-9.97459
			89265.1	-8.47								105356	-10.0026
			89270.2	-8.21								105360	-9.97498
			89275.3	-8.29								105365	-9.88451
			89280.4	-8.38								105369	-9.86595
			89284.6	-8.32								105373	-9.94219
			89288	-8.32								105378	-9.85099
			89292.3	-8.32								105382	-9.95597
			89295.7	-8.39								105386	-10.0215
			89299.9	-8.54								105391	-10.0281
			89303.3	-8.39								105395	-9.88578
			89307.5	-8.52								105399	-9.73643
			89310.9	-8.54								105404	-9.87302
			89315.2	-8.4								105408	-9.64315
			89319.4	-8.26								105412	-9.70307
			89323.6	-8.36								105417	-9.69512
			89327.9	-8.65								105421	-9.67081
			89333	-8.51								105425	-9.85201
			89337.2	-8.45								105430	-9.87602
			89342.3	-8.45								105434	-9.71692
			89348.2	-8.47								105439	-9.77798
			89353.3	-8.2								105443	-9.81216
			89359.3	-8.48								105447	-9.72247
			89365.2	-8.21								105452	-9.78244
			89371.1	-8.27								105456	-9.66104
			89377.9	-8.41								105461	-9.73042
			89384.7	-8.3								105465	-9.8453
			89390.6	-8.66								105470	-9.65639
			89397.4	-8.58								105474	-9.8347
			89404.2	-8.68								105479	-9.73238
			89411	-8.37								105483	-9.67702
			89417.8	-8.59								105488	-9.77089
			89424.6	-8.62								105492	-9.7305
			89431.3	-8.39								105497	-9.71507
			89437.3	-8.8								105501	-9.65488
			89444.1	-9.01								105506	-9.50613
			89450	-9.02								105511	-9.68971
			89455.1	-8.91								105515	-9.61117
			89460.2	-8.72								105520	-9.61587
			89464.4	-8.87								105524	-9.49294
			89468.6	-9.09								105529	-9.48525
			89472	-9.07								105533	-9.48612
			89473.7	-8.78								105538	-9.4185
			89474.6	-9.08								105542	-9.32468
			89475.4	-8.94								105547	-9.31589
			89476.3	-8.61								105551	-9.21917
			89477.1	-8.54								105556	-9.2102
			89478	-8.39								105560	-9.27715
			89478.8	-8.4								105564	-9.3398
			89482.2	-8.21								105569	-9.34308
			89489	-8.33								105573	-9.2839
												105578	-9.35868
												105582	-9.3812
												105587	-9.37067
												105591	-9.27766
												105596	-9.23838
												105600	-9.2864
												105604	-9.34298
												105609	-9.23987
												105613	-9.19448
												105617	-9.15589
												105622	-9.08813
												105626	-9.06681
												105630	-9.10107
												105635	-9.13606
												105639	-9.08213
												105643	-9.12077
												105647	-9.10207
												105651	-9.08868
												105656	-9.19768
												105660	-9.22363
												105664	-9.14994
												105668	-9.05278
												105672	-9.14422
												105677	-9.06733
												105681	-9.07678
												105685	-9.11446
												105689	-9.06719
												105693	-9.10558
												105697	-9.13595
												105701	-9.11622
												105705	-9.17621
												105710	-9.0533
												105714	-9.04739
												105718	-9.13354
												105722	-9.06692
												105726	-9.03334
												105730	-9.02606
												105735	-9.04793
												105739	-8.95456
												105743	-8.92453
												105747	-8.9482
												105751	-8.90635
												105756	-8.95462
												105760	-8.92843
												105764	-8.90959
												105768	-8.93187
												105773	-9.05377
												105777	-9.00699
												105781	-8.9874
												105786	-8.93334
												105790	-8.96449
												105795	-9.05422
												105799	-9.05229
												105803	-9.00112
												105808	-8.93901
												105812	-8.98488
												105817	-8.99673
												105821	-8.95715
												105826	-9.04625
												105830	-9.06483
												105835	-9.0222
												105839	-9.0388
												105844	-9.01034
												105849	-9.03574
												105853	-8.8858
												105858	-8.91644
												105862	-8.92118
												105867	-8.92222
												105871	-8.95235
												105876	-9.00988
												105880	-9.02881
												105885	-8.98694
												105889	-8.94532
												105894	-8.98327
												105898	-8.94857
												105903	-8.97876
												105907	-8.99822
												105911	-8.99454
												105916	-9.00193
												105920	-9.0314
												105925	-8.95613
												105929	-9.04079
												105933	-8.93586
												105938	-8.91263
												105942	-9.00409
												105946	-8.94348
												105951	-8.94278
												105955	-8.90068
												105959	-8.97695
												105963	-8.98217
												105967	-8.89618
												105971	-8.86829
												105975	-8.88187
												105979	-8.85765
												105983	-8.82678
												105987	-8.84356
												105990	-8.84398
												105994	-8.78679
												105998	-8.81341
												106002	-8.8762
												106005	-8.81738
												106009	-8.85522
												106013	-8.6694
												106016	-8.78823
												106020	-8.7949
												106024	-8.72883
												106028	-8.67151
												106031	-8.81428
												106035	-8.79722
												106039	-8.79152
												106043	-8.80347
												106047	-8.72292
												106050	-8.57251
												106054	-8.5643
												106058	-8.53381
												106062	-8.59062
												106066	-8.46475
												106070	-8.58034
												106075	-8.69254
												106079	-8.58828
												106083	-8.70207
												106087	-8.5315
												106092	-8.69806
												106096	-8.61593
												106100	-8.59726
												106105	-8.66488
												106109	-8.67235
												106114	-8.6889
												106118	-8.70539
												106123	-8.74777
												106127	-8.72659
												106132	-8.63318
												106136	-8.62476
												106141	-8.67292
												106145	-8.58589
												106150	-8.51303
												106154	-8.55017
												106159	-8.52566
												106163	-8.4541
												106168	-8.52838
												106173	-8.56177
												106177	-8.56484
												106182	-8.50418
												106186	-8.64143
												106191	-8.60155
												106195	-8.5542
												106200	-8.54939
												106204	-8.57727
												106208	-8.57141
												106213	-8.56692
												106217	-8.52885
												106222	-8.65586
												106226	-8.5173
												106230	-8.63834
												106235	-8.50477
												106239	-8.58382
												106244	-8.65386
												106248	-8.5784
												106252	-8.64795
												106257	-8.67206
												106261	-8.6476
												106266	-8.62934
												106270	-8.70066
												106275	-8.52864
												106279	-8.606
												106284	-8.53433
												106288	-8.54117
												106293	-8.55103
												106297	-8.57513
												106302	-8.55753
												106307
												106311
												106316	-8.50029
												106320	-8.51531
												106325	-8.49043
												106330	-8.48394
												106335	-8.55364
												106339	-8.50716
												106344	-8.51389
												106349	-8.49698
												106354	-8.4681
												106358	-8.49546
												106363	-8.51528
												106368	-8.52677
												106373	-8.48869
												106378	-8.37573
												106383	-8.54531
												106388	-8.46622
												106393	-8.51788
												106398	-8.42599
												106404	-8.4311
												106409	-8.48484
												106414	-8.39593
												106419	-8.44239
												106424	-8.42616
												106429	-8.42776
												106435	-8.49807
												106440	-8.55151
												106445	-8.49088
												106450	-8.60108
												106456	-8.53434
												106461	-8.46183
												106466	-8.55576
												106472	-8.56696
												106477	-8.42514
												106482	-8.31531
												106488	-8.40418
												106493	-8.45412
												106498	-8.45858
												106504	-8.56553
												106509	-8.57239
												106515	-8.60871
												106520	-8.55199
												106526	-8.60757
												106532	-8.56019
												106538	-8.58133
												106543	-8.55359
												106549	-8.64893
												106555	-8.64271
												106561	-8.55723
												106567	-8.62248
												106572	-8.50381
												106578	-8.47579
												106584	-8.55113
												106590	-8.70506
												106596	-8.59922
												106602	-8.63528
												106608	-8.70868
												106614	-8.64152
												106620	-8.54936
												106625	-8.68699
												106631	-8.53267
												106637	-8.58002
												106643	-8.6929
												106649	-8.60026
												106655	-8.61689
												106660	-8.66875
												106666	-8.64183
												106672	-8.68955
												106678	-8.72562
												106683	-8.6936
												106689	-8.59322
												106695	-8.52452
												106701	-8.53596
												106706	-8.67289
												106712	-8.65499
												106718	-8.50563
												106723	-8.5455
												106729	-8.53828
												106735	-8.62558
												106740	-8.67447
												106746	-8.6087
												106752	-8.59381
												106758	-8.54861
												106763	-8.61793
												106769	-8.54577
												106775	-8.5094
												106781	-8.49504
												106787	-8.4613
												106793	-8.48704
												106799	-8.57257
												106805	-8.56717
												106811	-8.50483
												106817	-8.56232
												106823	-8.58424
												106829	-8.60211
												106836	-8.61378
												106842	-8.58906
												106848	-8.60278
												106855	-8.50821
												106861	-8.6033
												106867	-8.69911
												106874	-8.46427
												106880	-8.60354
												106887	-8.56195
												106893	-8.65856
												106900	-8.66608
												106906	-8.64963
												106912	-8.42671
												106919	-8.55085
												106925	-8.51536
												106931	-8.48365
												106938	-8.61332
												106944	-8.59583
												106950	-8.67587
												106956	-8.59854
												106963	-8.44211
												106969	-8.54228
												106975	-8.47277
												106981	-8.47055
												106987	-8.43192
												106993	-8.47849
												106999	-8.42507
												107006	-8.62178
												107012	-8.54501
												107018	-8.52055
												107024	-8.45979
												107030	-8.48814
												107036	-8.46777
												107042	-8.54256
												107048	-8.54341
												107054	-8.52585
												107060	-8.51499
												107067	-8.472
												107073	-8.50952
												107079	-8.58633
												107085	-8.56671
												107092	-8.54665
												107098	-8.55058
												107104	-8.55605
												107111	-8.6457
												107117	-8.63521
												107124	-8.58257
												107130	-8.53781
												107137	-8.56967
												107144	-8.49287
												107151	-8.6085
												107157	-8.58264
												107164	-8.51955
												107171	-8.52075
												107178	-8.4871
												107185	-8.56007
												107192	-8.62336
												107199	-8.57271
												107206	-8.47188
												107213	-8.63193
												107220	-8.64117
												107227	-8.64768
												107234	-8.59365
												107241	-8.56594
												107248	-8.69553
												107255	-8.65291
												107262	-8.64834
												107269	-8.65764
												107276	-8.69774
												107282	-8.69557
												107289	-8.75899
												107296	-8.78377
												107302	-8.79228
												107309	-8.80424
												107316	-8.84776
												107322	-8.85205
												107329	-8.88133
												107335	-8.91726
												107341	-8.84353
												107348	-8.91456
												107354	-8.86466
												107360	-8.83168
												107367	-8.88597
												107373	-8.98617
												107379	-8.98245
												107385	-8.94654
												107392	-9.04508
												107398	-8.9896
												107404	-8.9968
												107410	-9.07804
												107416	-9.00331
												107422	-9.07784
												107428	-9.05088
												107434	-8.9515
												107441	-9.04868
												107447	-9.10844
												107453	-9.01258
												107459	-9.05574
												107472	-9.06982
												107478	-9.06938
												107484	-9.01623
												107491	-9.08637
												107498	-8.9573
												107504	-9.03199
												107511	-9.02554
												107518	-8.95095
												107526	-8.8634
												107533	-8.88643
												107541	-8.77396
												107548	-8.72674
												107556	-8.67269
												107563	-8.6182
												107571	-8.56861
												107579	-8.48333
												107587	-8.44813
												107594	-8.39948
												107602	-8.34857
												107610	-8.49985
												107617	-8.45437
												107625	-8.44392
												107632	-8.39117
												107639	-8.58025
												107646	-8.59085
												107653	-8.68244
												107660	-8.47491
												107667	-8.52316
												107674	-8.39164
												107681	-8.49243
												107688	-8.4353
												107694	-8.42827
												107701	-8.46499
												107707	-8.57103
												107713	-8.43974
												107720	-8.37486
												107726	-8.45568
												107732	-8.48837
												107739	-8.46571
												107745	-8.42075
												107751	-8.47466
												107757	-8.4749
												107763	-8.68878
												107769	-8.48719
												107775	-8.42745
												107781	-8.37387
												107787	-8.40744
												107793	-8.40082
												107799	-8.43453
												107805	-8.39722
												107811	-8.45133
												107818	-8.39447
												107824	-8.37814
												107830	-8.50752
												107836	-8.57743
												107842	-8.50128
												107848	-8.53608
												107854	-8.48127
												107860	-8.58112
												107867	-8.61552
												107873	-8.63818
												107879	-8.69984
												107885	-8.67537
												107891	-8.74767
												107898	-8.7982
												107904	-8.89436
												107910	-8.95294
												107916	-8.89942
												107922	-8.99816
												107929	-8.87439
												107935	-8.98017
												107941	-9.01443
												107947	-8.98824
												107953	-8.9151
												107959	-8.95333
												107965	-8.93972
												107971	-8.96454
												107977	-8.92327
												107983	-8.99567
												107989	-9.05618
												107995	-8.96863
												108001	-8.99862
												108007	-8.95256
												108013	-8.95049
												108019	-8.97609
												108024	-9.02335
												108030	-9.03815
												108036	-9.02547
												108042	-9.00215
												108047	-9.11038
												108053	-9.08113
												108059	-9.14442
												108064	-9.17747
												108070	-9.09988
												108076	-9.13947
												108081	-9.21988
												108087	-9.33729
												108093	-9.31154
												108099	-9.27197
												108104	-9.26807
												108110	-9.21826
												108116	-9.27236
												108122	-9.26485
												108128	-9.36716
												108133	-9.30378
												108139	-9.28282
												108145	-9.36678
												108151	-9.37319
												108157	-9.407
												108163	-9.40823
												108169	-9.42076
												108175	-9.42878
												108181	-9.45648
												108187	-9.46664
												108192	-9.47563
												108198	-9.35174
												108204	-9.42007
												108210	-9.44903
												108216	-9.53164
												108222	-9.5927
												108227	-9.56529
												108233	-9.56593
												108239	-9.568
												108245	-9.62877
												108250	-9.82866
												108256	-9.97469
												108262	-10.1121
												108268	-10.2003
												108274	-10.3184
												108279	-10.2115
												108285	-10.2983
												108291	-10.3897
												108297	-10.3447
												108303	-10.6189
												108308	-10.6202
												108314	-10.6677
												108320	-10.6849
												108326	-10.7113
												108332	-10.844
												108338	-10.9496
												108344	-10.9287
												108350	-11.0798
												108356	-11.1593
												108362	-11.2883
												108368	-11.3731
												108374	-11.3899
												108381	-11.4336
												108387	-11.5102
												108393	-11.5669
												108399	-11.6652
												108405	-11.7785
												108412	-11.77
												108418	-11.8532
												108424	-11.8055
												108430	-11.8124
												108437	-11.8051
												108443	-11.9382
												108449	-11.9599
												108455	-12.0071
												108462	-11.9097
												108468	-12.0177
												108474	-11.9584
												108481	-11.9462
												108487	-12.0178
												108493	-12.0079
												108500	-11.9976
												108506	-12.0278
												108513	-12.0593
												108519
												108526	-12.0106
												108532	-11.9479
												108539	-11.9977
												108546	-11.9919
												108553	-12.0721
												108560	-11.943
												108567	-12.0475
												108574	-12.0102
												108581	-12.0264
												108589	-12.01
												108596	-11.9519
												108604	-12.0221
												108612	-12.107
												108620	-12.1099
												108628	-12.0082
												108637	-12.0114
												108645	-11.9798
												108654	-11.9985
												108662	-12.0195
												108671	-12.0396
												108679	-12.0164
												108688	-12.0066
												108696	-12.0619
												108705	-12.0466
												108713	-12.1156
												108721	-12.1228
												108729	-12.0253
												108737	-12.0393
												108745	-12.0494
												108753	-12.0741
												108760	-12.0797
												108768	-11.9936
												108775	-12.0787
												108783	-12.0882
												108790	-12.0627
												108797	-12.0418
												108805	-12.0623
												108812	-12.1112
												108819	-12.067
												108826	-11.9981
												108833	-12.0322
												108840	-12.0603
												108847	-12.0708
												108854	-11.995
												108861	-12.1192
												108869	-12.1088
												108876	-12.098
												108883	-12.047
												108890	-12.0323
												108897	-12.0711
												108904	-12.0928
												108911	-12.0456
												108918	-12.0135
												108925	-12.0032
												108932	-11.9644
												108939	-12.064
												108947	-12.0121
												108954	-11.9672
												108961	-12.0741
												108968	-12.0115
												108975	-11.9881
												108982	-12.0867
												108989	-11.9775
												108996	-12.0973
												109003	-12.0701
												109011	-11.9662
												109018	-11.9897
												109025	-12.0588
												109032	-12.0333
												109039	-12.0039
												109046	-12.001
												109053	-12.032
												109061	-12.0041
												109068	-11.8919
												109076	-11.9475
												109084	-11.8829
												109092	-11.9972
												109100	-12.011
												109108	-11.9728
												109116	-11.9306
												109125	-11.8499
												109134	-11.8859
												109143	-11.9464
												109152	-11.8855
												109161	-11.9394
												109171	-11.8312
												109180	-11.7128
												109190	-11.8399
												109200	-11.8188
												109209	-11.7144
												109219	-11.8259
												109229	-11.7047
												109239	-11.7692
												109249	-11.6934
												109259	-11.8799
												109269	-11.8868
												109278	-11.8109
												109288	-11.832
												109298	-11.816
												109308	-11.8225
												109317	-11.8
												109327	-11.7655
												109336	-11.8518
												109345	-11.7199
												109354	-11.7352
												109363	-11.7622
												109372	-11.782
												109381	-11.8978
												109390	-11.923
												109398	-11.9146
												109407	-11.8172
												109415	-11.7859
												109423	-11.7761
												109431	-11.772
												109439	-11.7372
												109447	-11.7822
												109455	-11.7814
												109463	-11.8222
												109470	-11.7476
												109478	-11.8353
												109486	-11.832
												109493	-11.985
												109500	-11.8979
												109508	-11.8659
												109515	-11.8403
												109523	-11.9036
												109530	-11.874
												109537	-11.9214
												109545	-11.9008
												109552	-11.7672
												109560	-11.9112
												109567	-11.8209
												109575	-11.9619
												109583	-11.8635
												109590	-11.888
												109598	-11.9374
												109606	-11.8511
												109613	-11.8467
												109621	-11.9333
												109628	-11.956
												109636	-11.9597
												109643	-11.9948
												109650	-11.9407
												109657	-11.9273
												109664	-11.9127
												109671	-11.8731
												109677	-11.9317
												109684	-11.9362
												109690	-11.9298
												109697	-11.858
												109704	-11.9138
												109710	-11.9239
												109717	-11.8797
												109725	-11.9089
												109732	-11.8694
												109740	-11.9018
												109748	-11.9407
												109757	-11.8878
												109766	-11.8668
												109776	-11.9135
												109786	-11.9585
												109797	-11.9191
												109808	-11.8913
												109819	-11.7874
												109831	-11.9245
												109842	-11.8987
												109853	-11.9166
												109864	-11.8787
												109875	-11.79
												109886	-11.8159
												109896	-11.8476
												109906	-11.867
												109915	-11.8754
												109924	-11.9398
												109933	-11.9069
												109941	-11.9436
												109948	-11.8378
												109955	-11.8655
												109963	-11.8713
												109969	-12.0223
												109976	-11.8555
												109983	-11.9157
												109990	-11.7999
												109996	-11.7508
												110003	-11.9397
												110010	-11.8275
												110017	-11.9535
												110024	-11.9093
												110031	-11.9516
												110038	-11.8927
